# Supplementary material
Source: MDPI journal article supplement (https://www.mdpi.com/2813-3145/2/1/4)

## ***Supporting Information***

### **4-Disubstituted pyrazolin-3-ones — novel class of fungicides against phytopathogenic fungi**

**Elena R. Lopat'eva<sup>1</sup>, Alexander S. Budnikov<sup>1,3</sup>, Igor B. Krylov<sup>1,2,3\*</sup>, Anna L. Alekseenko,<sup>1,2</sup> Alexey I. Ilovaisky,<sup>1,3</sup> Alexey P. Glinushkin<sup>3</sup> and Alexander O. Terent'ev<sup>1,2,3</sup>**

<sup>1</sup> N. D. Zelinsky Institute of Organic Chemistry, Russian Academy of Sciences, 47 Leninsky Prospekt, 119991 Moscow, Russia

<sup>2</sup> Faculty of Chemical and Pharmaceutical Technology and Biomedical Products, D. I. Mendeleev University of Chemical Technology of Russia, 9 Miusskaya Square, 125047 Moscow, Russia

<sup>3</sup> All-Russian Research Institute for Phytopathology, B. Vyazyomy, 143050 Moscow Region, Russia

\* Correspondence: alterex@yandex.ru (A.O. Terent'ev); krylovigor@yandex.ru (I.B. Krylov)

## Table of contents

|                                                                                      |   |
|--------------------------------------------------------------------------------------|---|
| General .....                                                                        | 3 |
| The $^1\text{H}$ and $^{13}\text{C}$ spectra of 4-substituted pyrazolin-3-ones ..... | 4 |

## General

In all experiments RT stands for 22–25 °C.  $^1\text{H}$  and  $^{13}\text{C}$  NMR spectra were recorded on a Bruker AVANCE II 300 and Bruker Fourier 300HD (300.13 and 75.47 MHz, respectively) spectrometers in  $\text{CDCl}_3$  and  $\text{DMSO}-\text{D}_6$ . Residual signals of  $\text{CDCl}_3$  (7.26 in  $^1\text{H}$  NMR, 77.16 in  $^{13}\text{C}$  NMR) or  $\text{DMSO}-\text{d}_6$  (2.50 in  $^1\text{H}$  NMR, 39.52 in  $^{13}\text{C}$  NMR) were used as reference signals for precise chemical shift determination. FT-IR spectra were recorded on Bruker Alpha instrument. IR spectra were registered in KBr pellets for solid compounds, and liquid compounds were placed between two KBr windows to make a thin layer. High resolution mass spectra (HR-MS) were measured on a Bruker maXis instrument using electrospray ionization (ESI). The measurements were performed in a positive ion mode (interface capillary voltage – 4500 V); mass range from  $m/z$  50 to  $m/z$  3000 Da; external calibration with Electrospray Calibrant Solution (Fluka). A syringe injection was used for acetonitrile solutions of synthesized compounds (flow rate 3  $\mu\text{L}/\text{min}$ ). Nitrogen was applied as a dry gas; interface temperature was set at 180 °C.

## **Spectral data of the 4-substituted pyrazolin-3-ones**

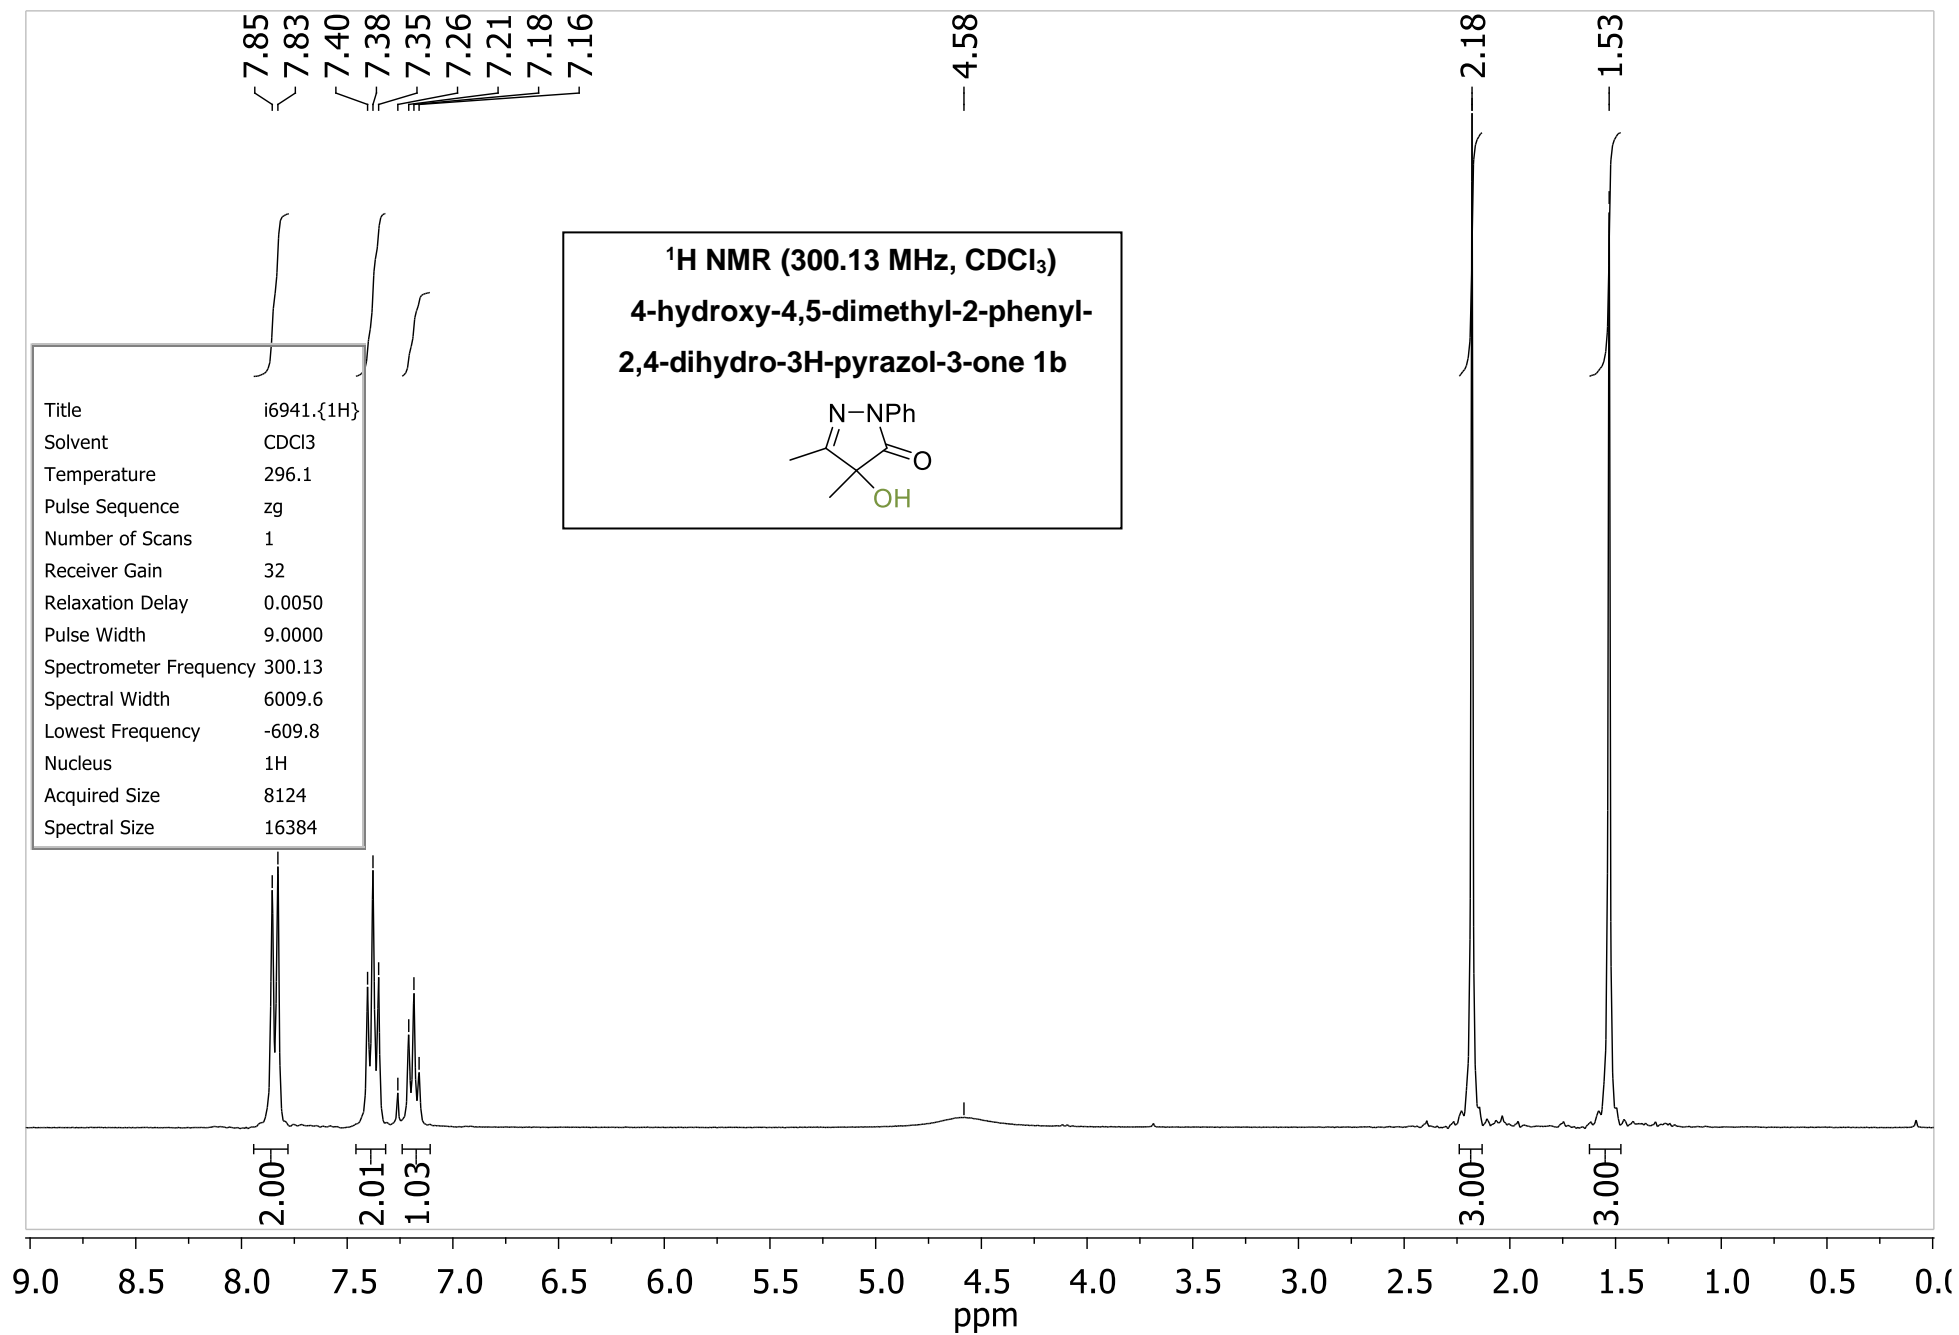

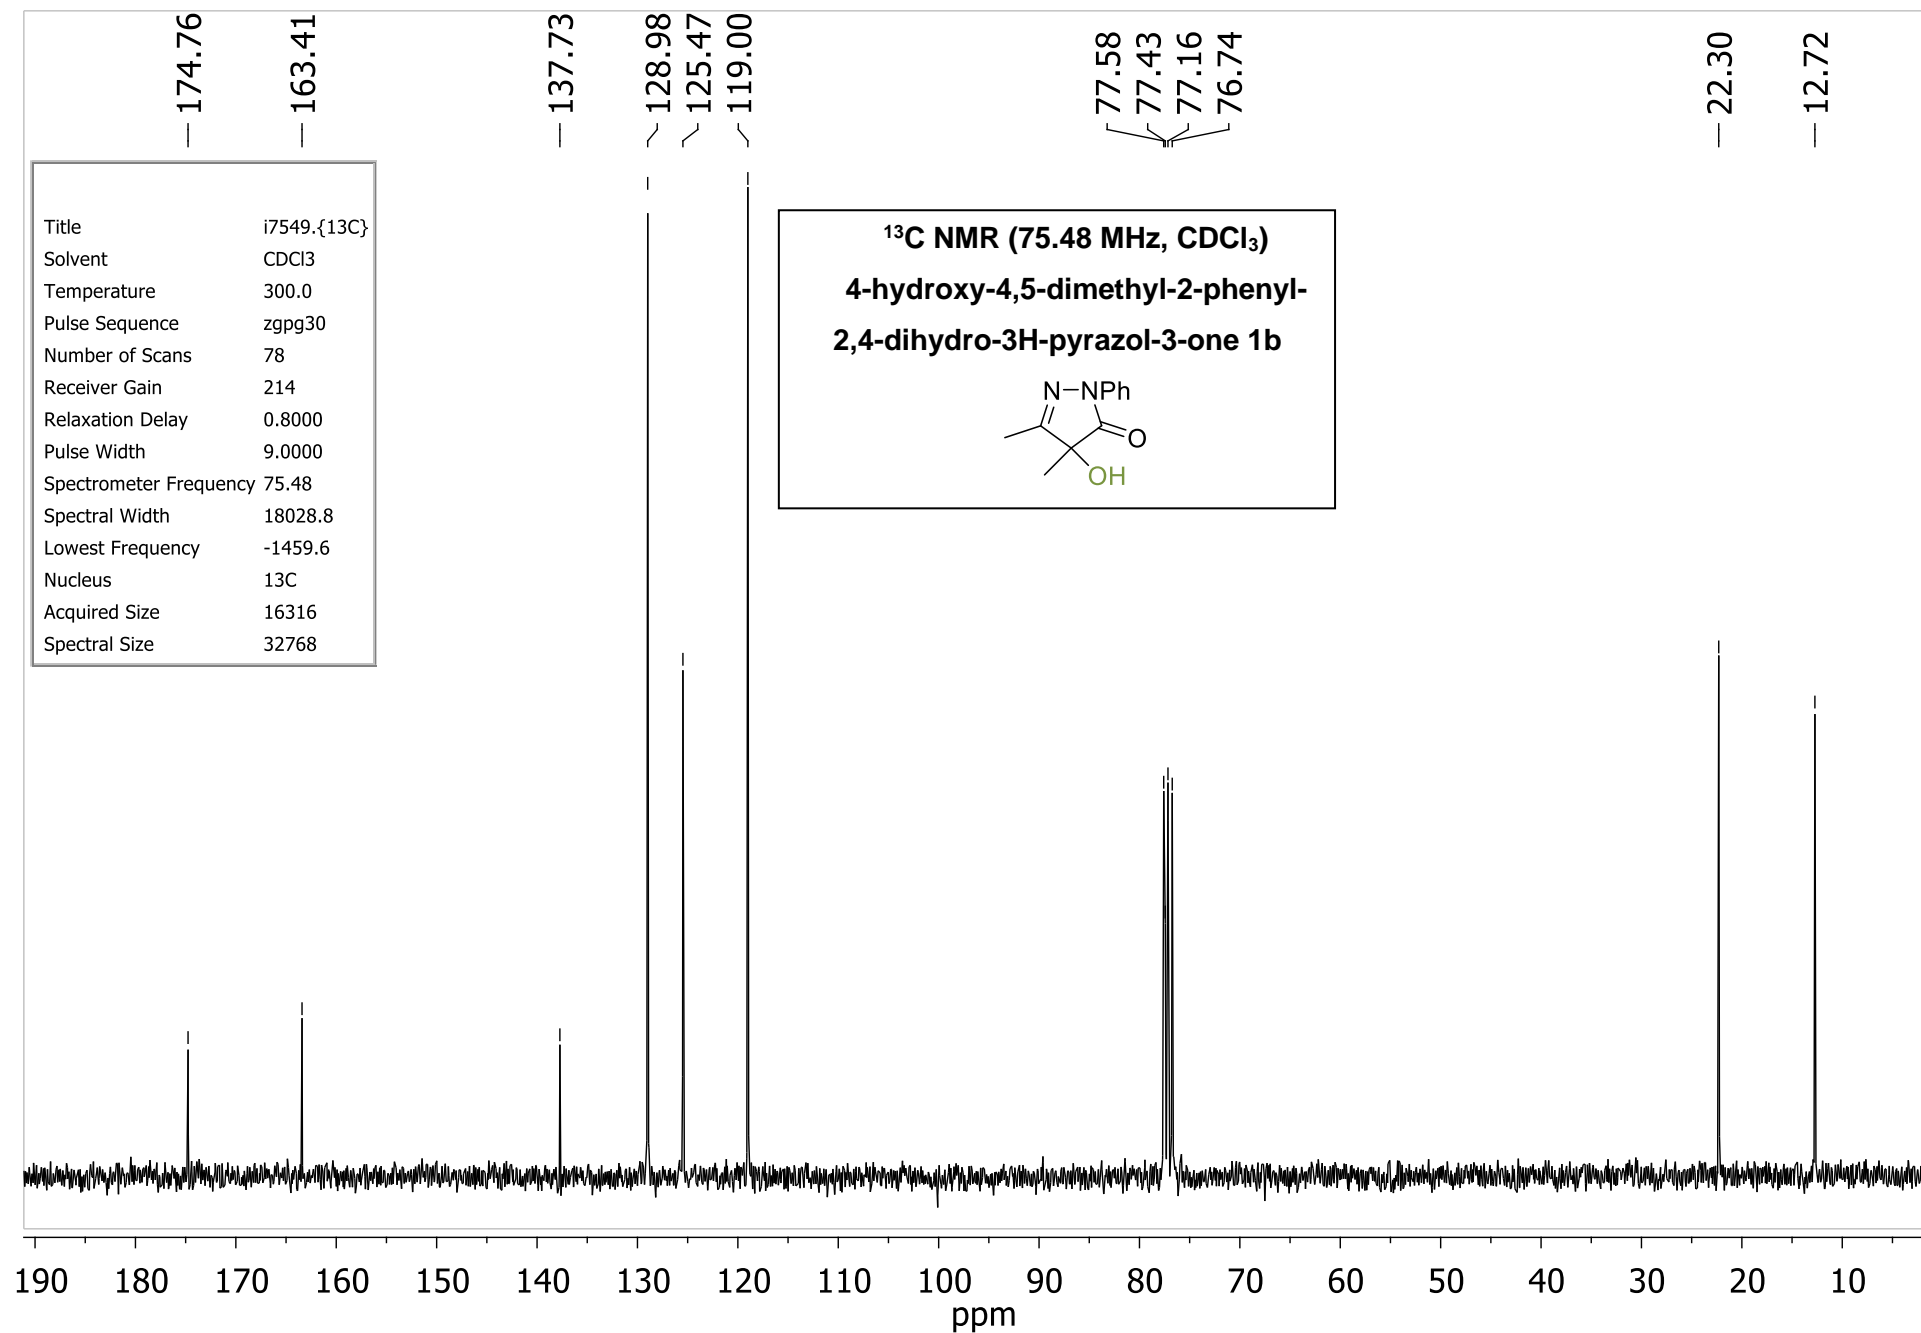

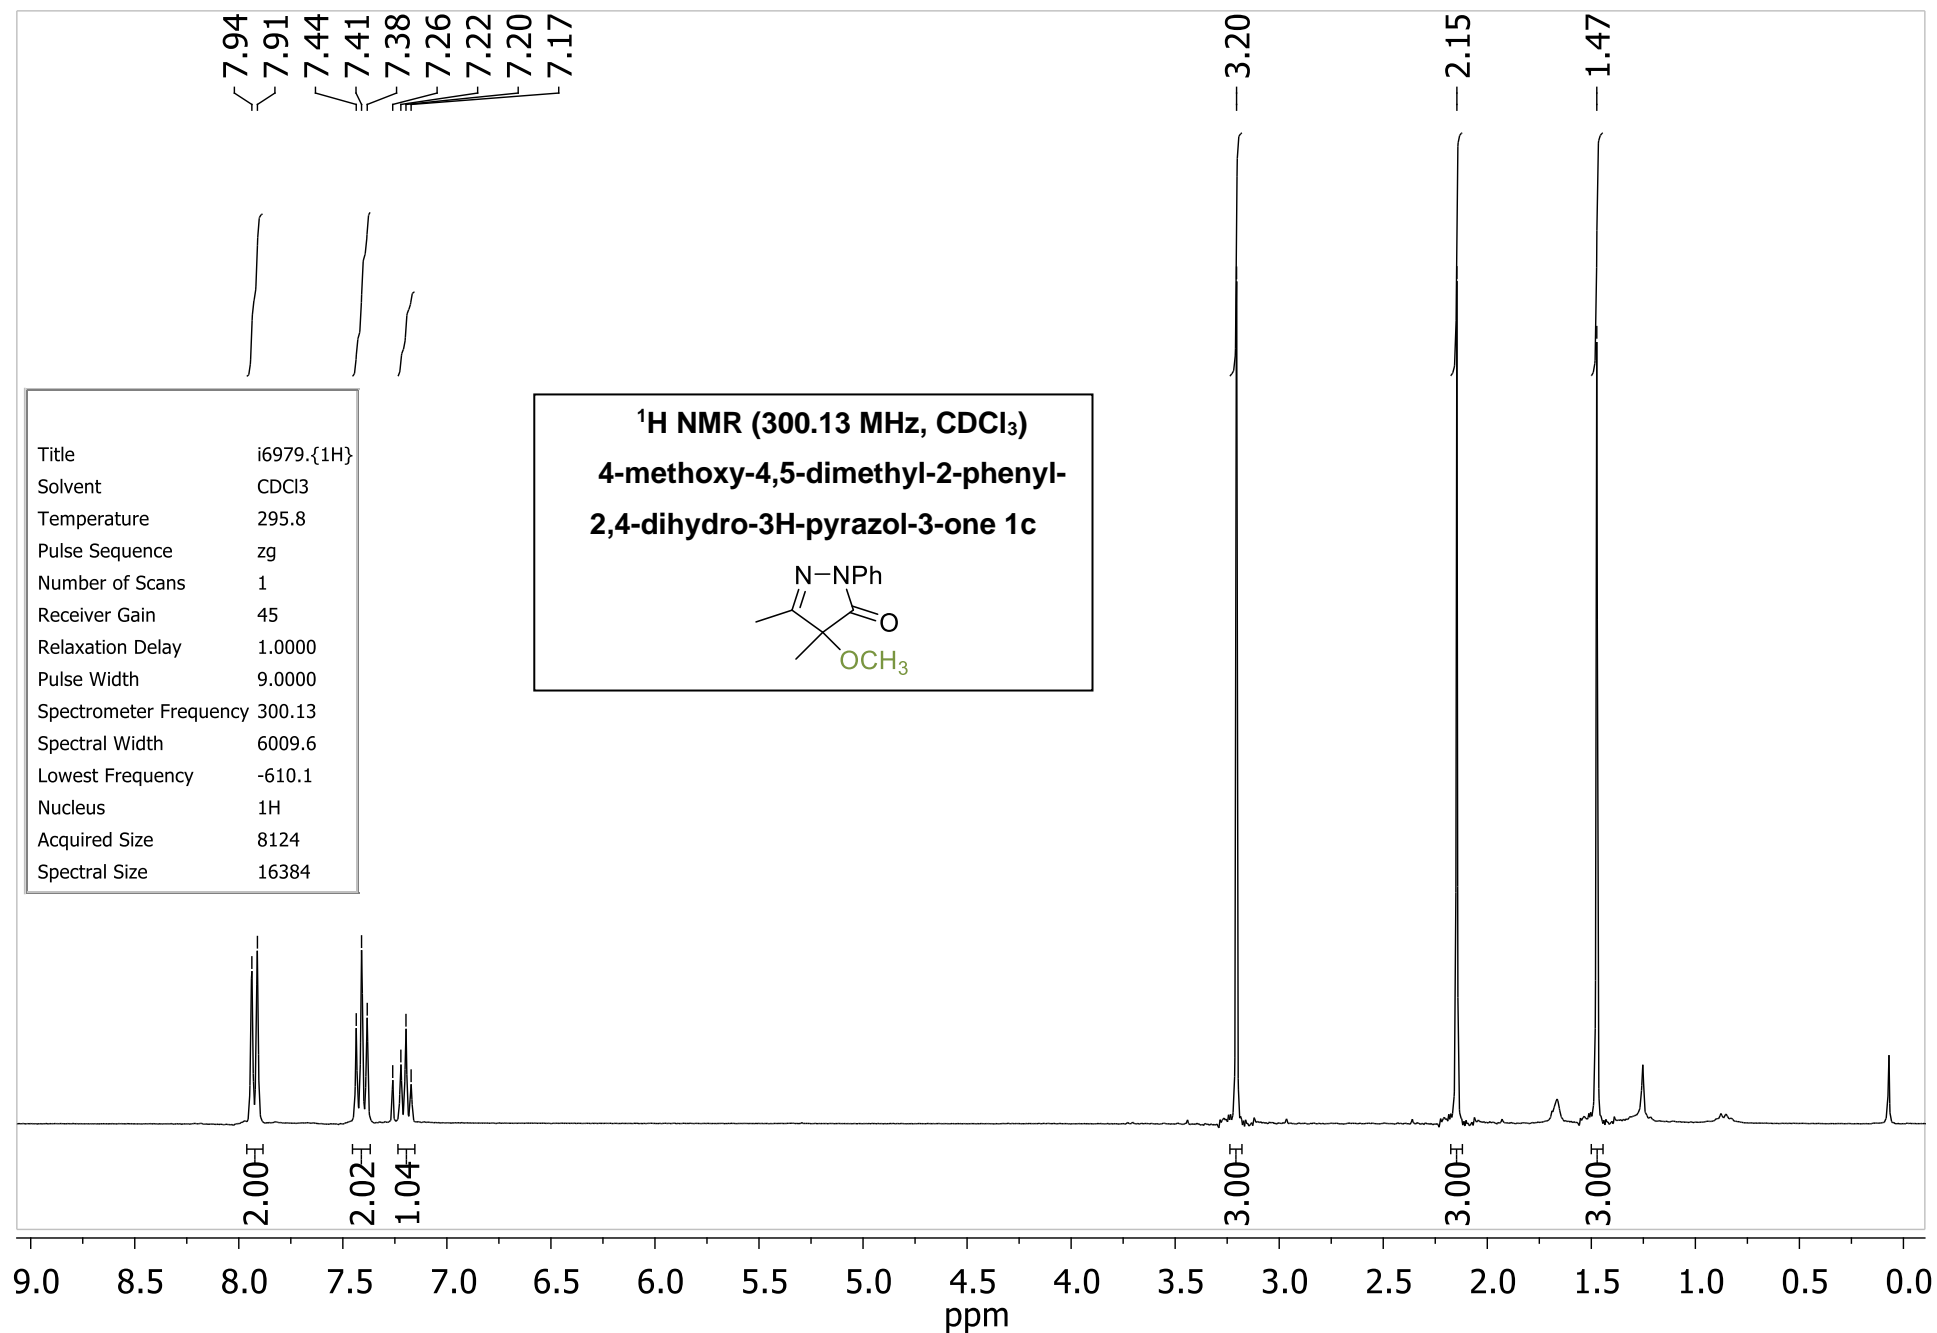

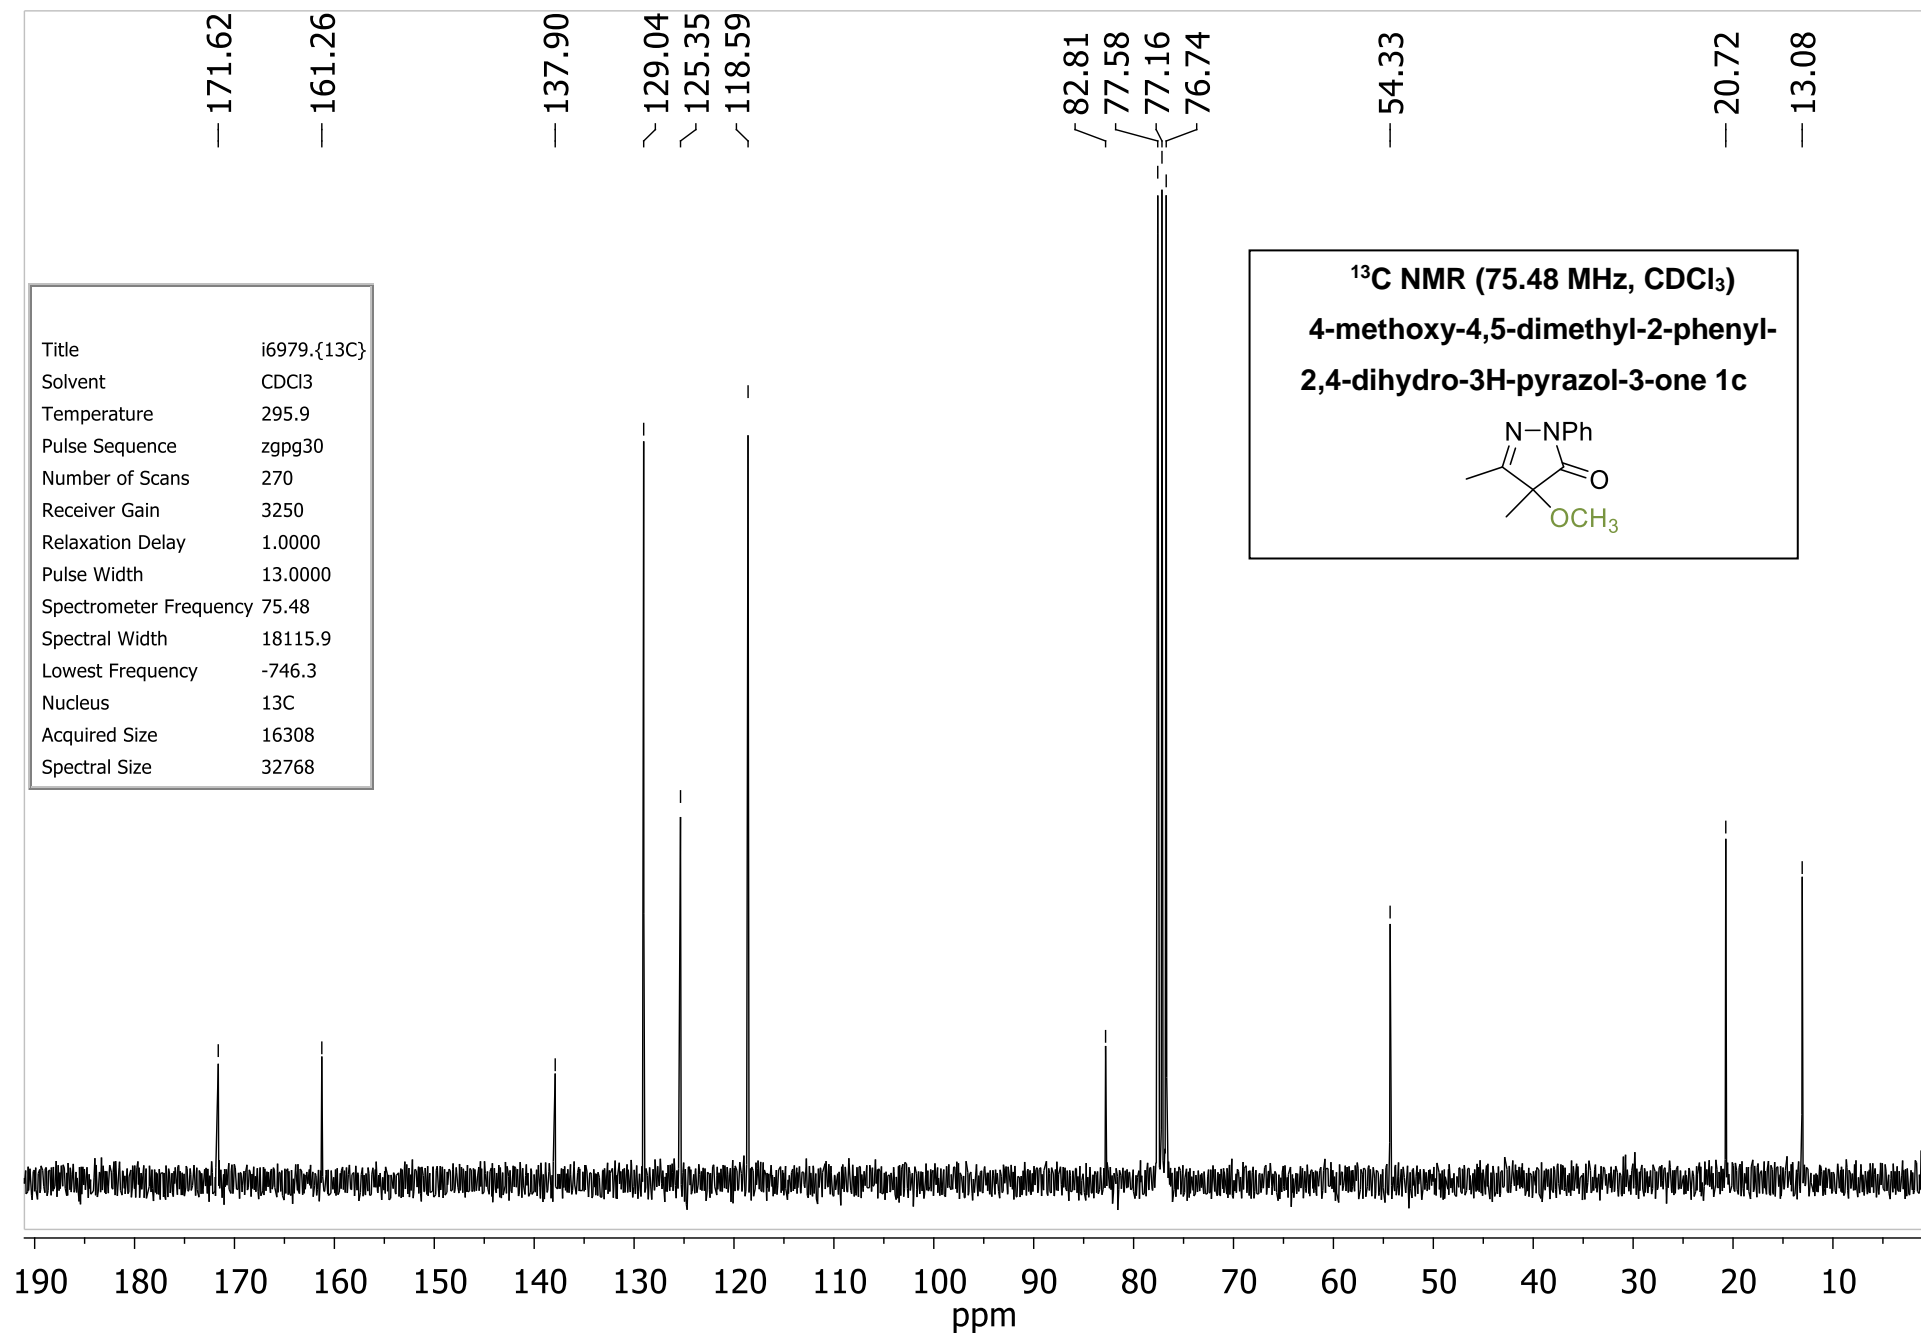



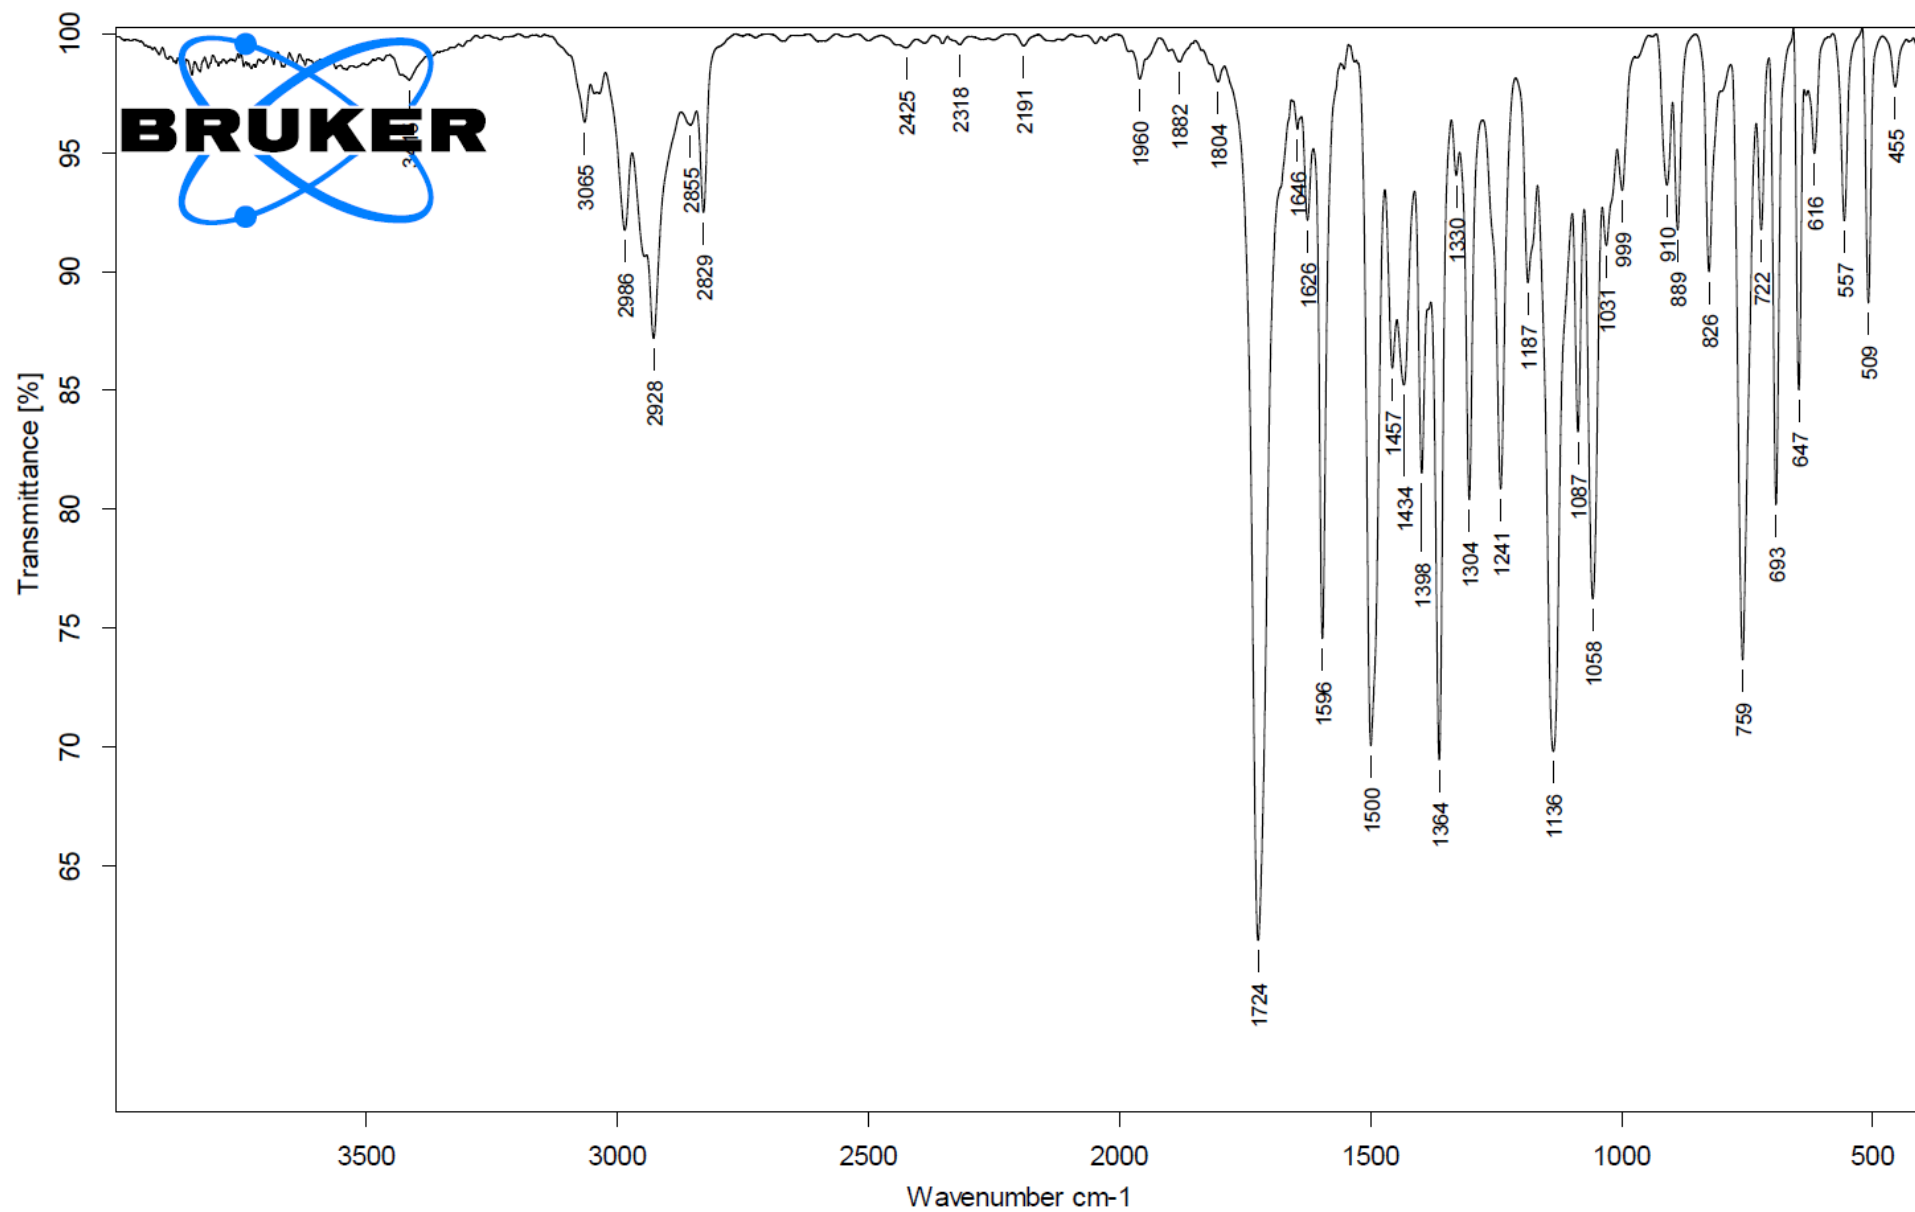

## Display Report

### Analysis Info

Analysis Name D:\Data\Kolotyrkina\2022\Lopat'eva\1013001.d  
Method tune\_low.m  
Sample Name /TERN LL-1622  
Comment C12H14N2O2 mH 219.1128 calibrant added, CH3CN

Acquisition Date 13.10.2022 10:46:40  
Operator BDAL@DE  
Instrument / Ser# microTOF 10248

### Acquisition Parameter

|             |            |                      |          |                  |           |
|-------------|------------|----------------------|----------|------------------|-----------|
| Source Type | ESI        | Ion Polarity         | Positive | Set Nebulizer    | 0.4 Bar   |
| Focus       | Not active |                      |          | Set Dry Heater   | 180 °C    |
| Scan Begin  | 50 m/z     | Set Capillary        | 4500 V   | Set Dry Gas      | 4.0 l/min |
| Scan End    | 2500 m/z   | Set End Plate Offset | -500 V   | Set Divert Valve | Waste     |

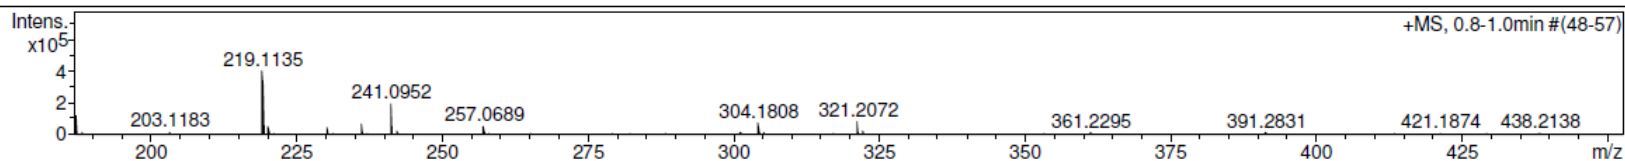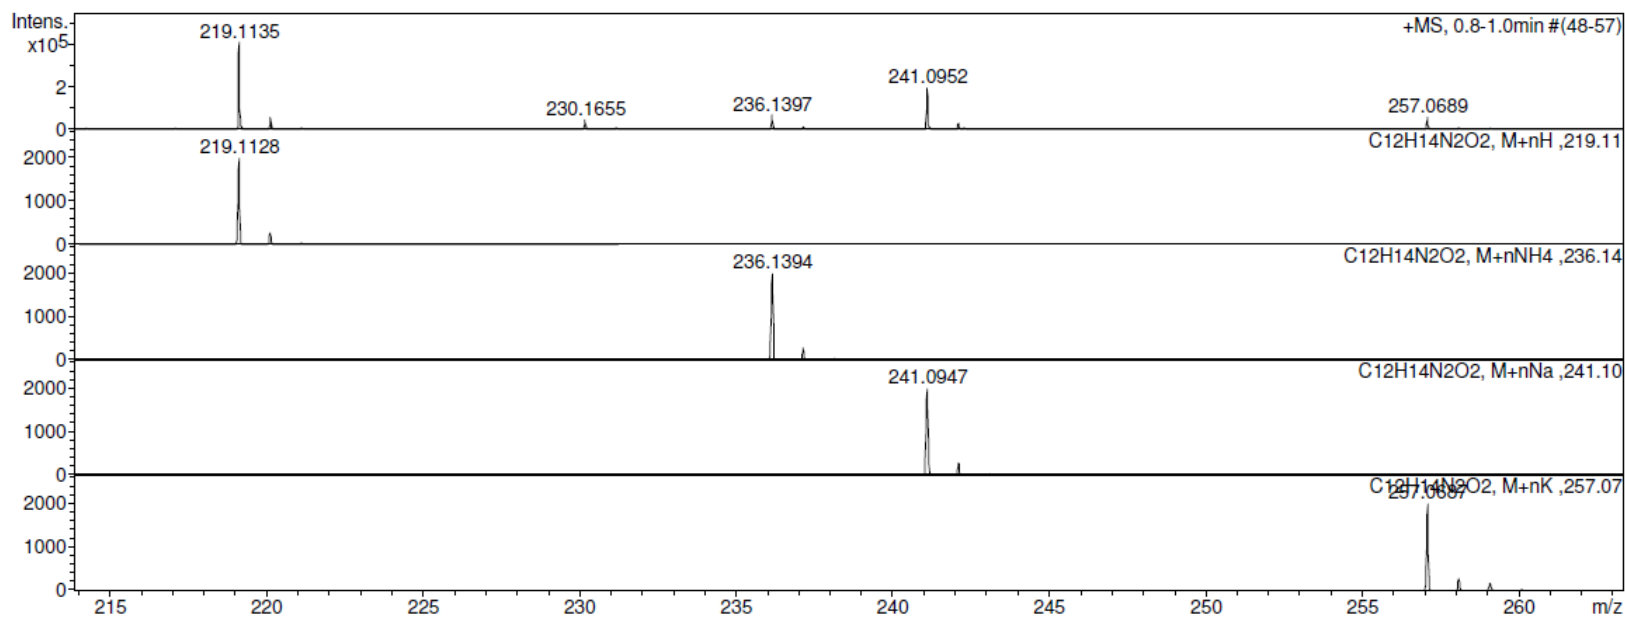

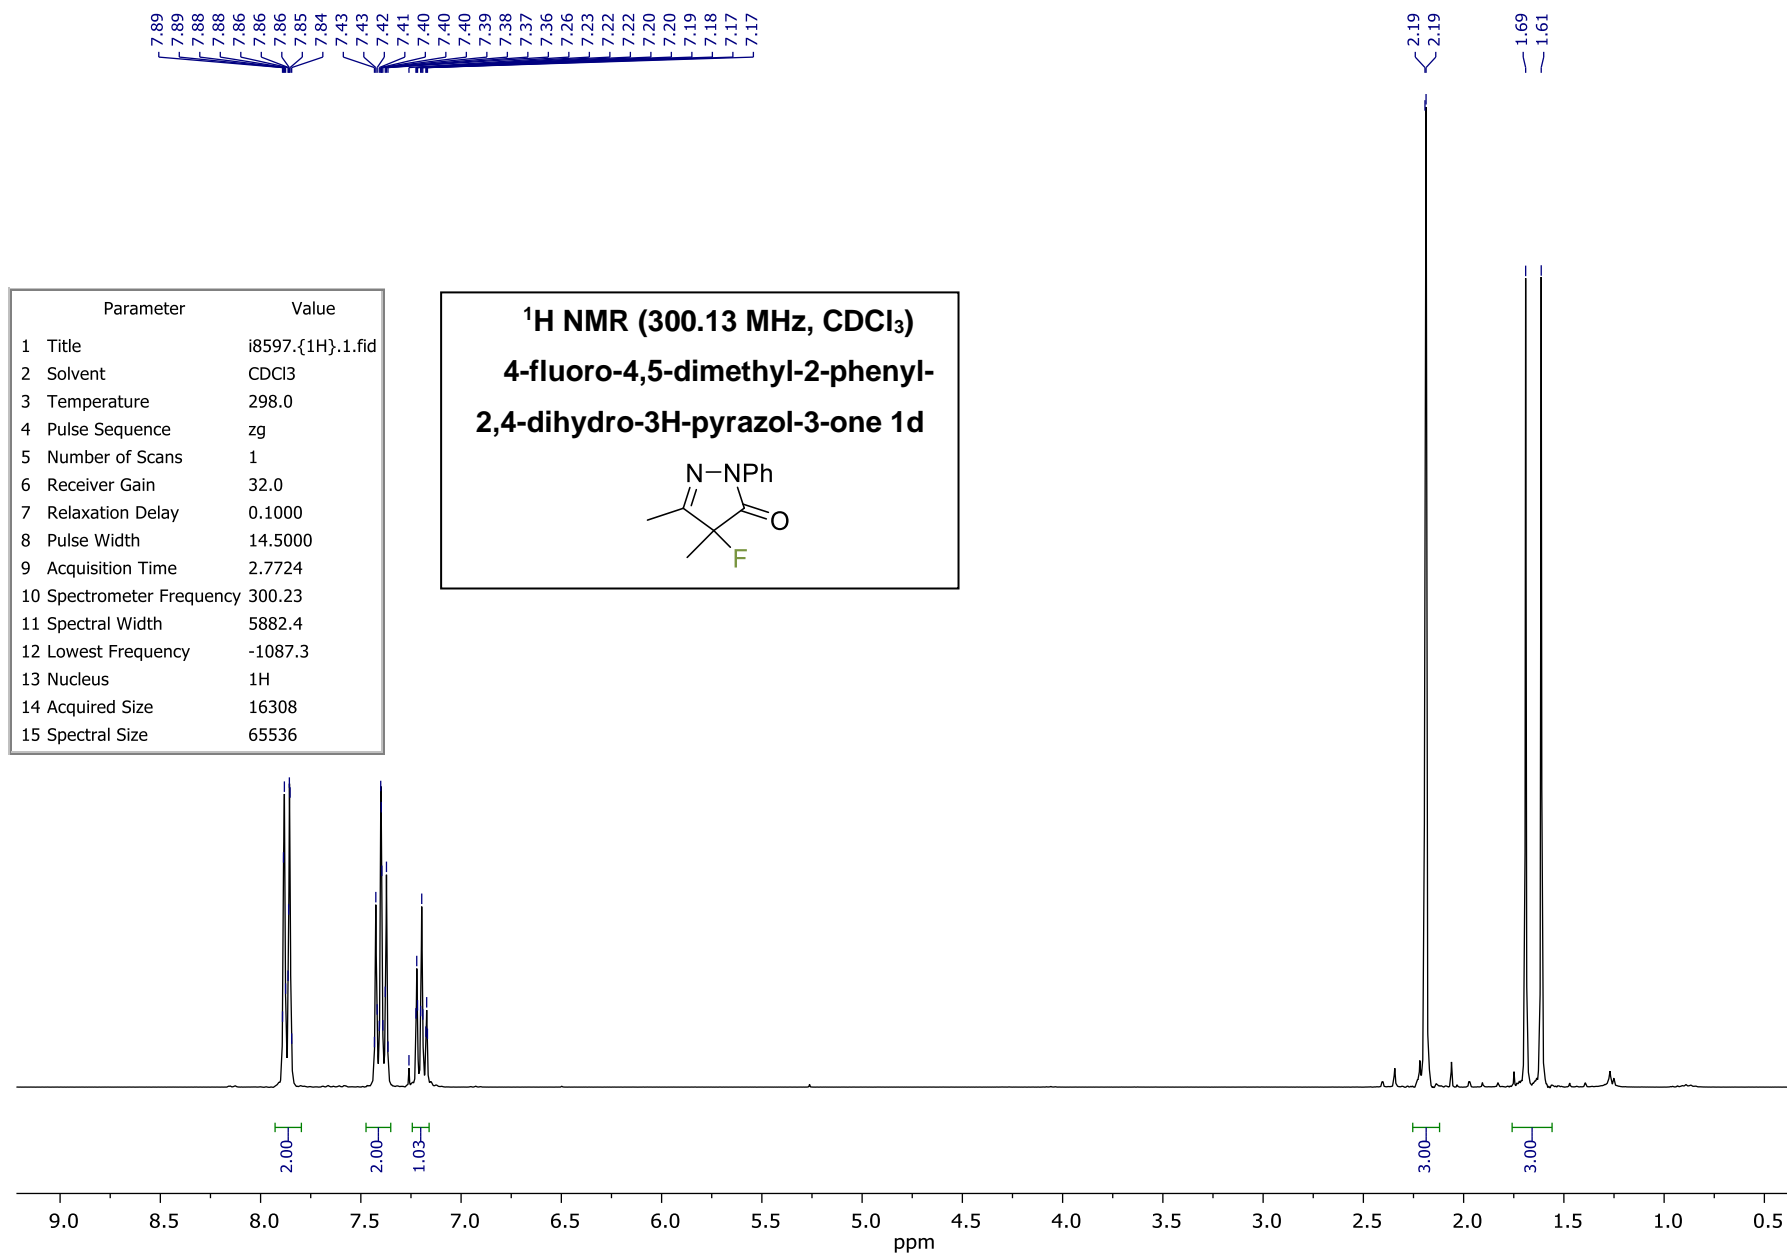

168.33  
168.04

158.23  
158.01

137.43

128.96  
125.48

118.53

93.38  
90.85

77.58  
77.16  
76.74

19.01  
18.65  
12.67  
12.65

**<sup>13</sup>C NMR (75.48 MHz, CDCl<sub>3</sub>)**

**4-fluoro-4,5-dimethyl-2-phenyl-  
2,4-dihydro-3H-pyrazol-3-one 1d**

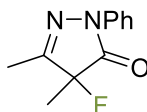

| Parameter                 | Value             |
|---------------------------|-------------------|
| 1 Title                   | i8597.{13C}.2.fid |
| 2 Solvent                 | CDCl <sub>3</sub> |
| 3 Temperature             | 298.0             |
| 4 Pulse Sequence          | zgpg30            |
| 5 Number of Scans         | 100               |
| 6 Receiver Gain           | 101.0             |
| 7 Relaxation Delay        | 0.8000            |
| 8 Pulse Width             | 10.0000           |
| 9 Acquisition Time        | 1.1431            |
| 10 Spectrometer Frequency | 75.50             |
| 11 Spectral Width         | 17857.1           |
| 12 Lowest Frequency       | -1380.0           |
| 13 Nucleus                | <sup>13</sup> C   |
| 14 Acquired Size          | 20412             |
| 15 Spectral Size          | 65536             |

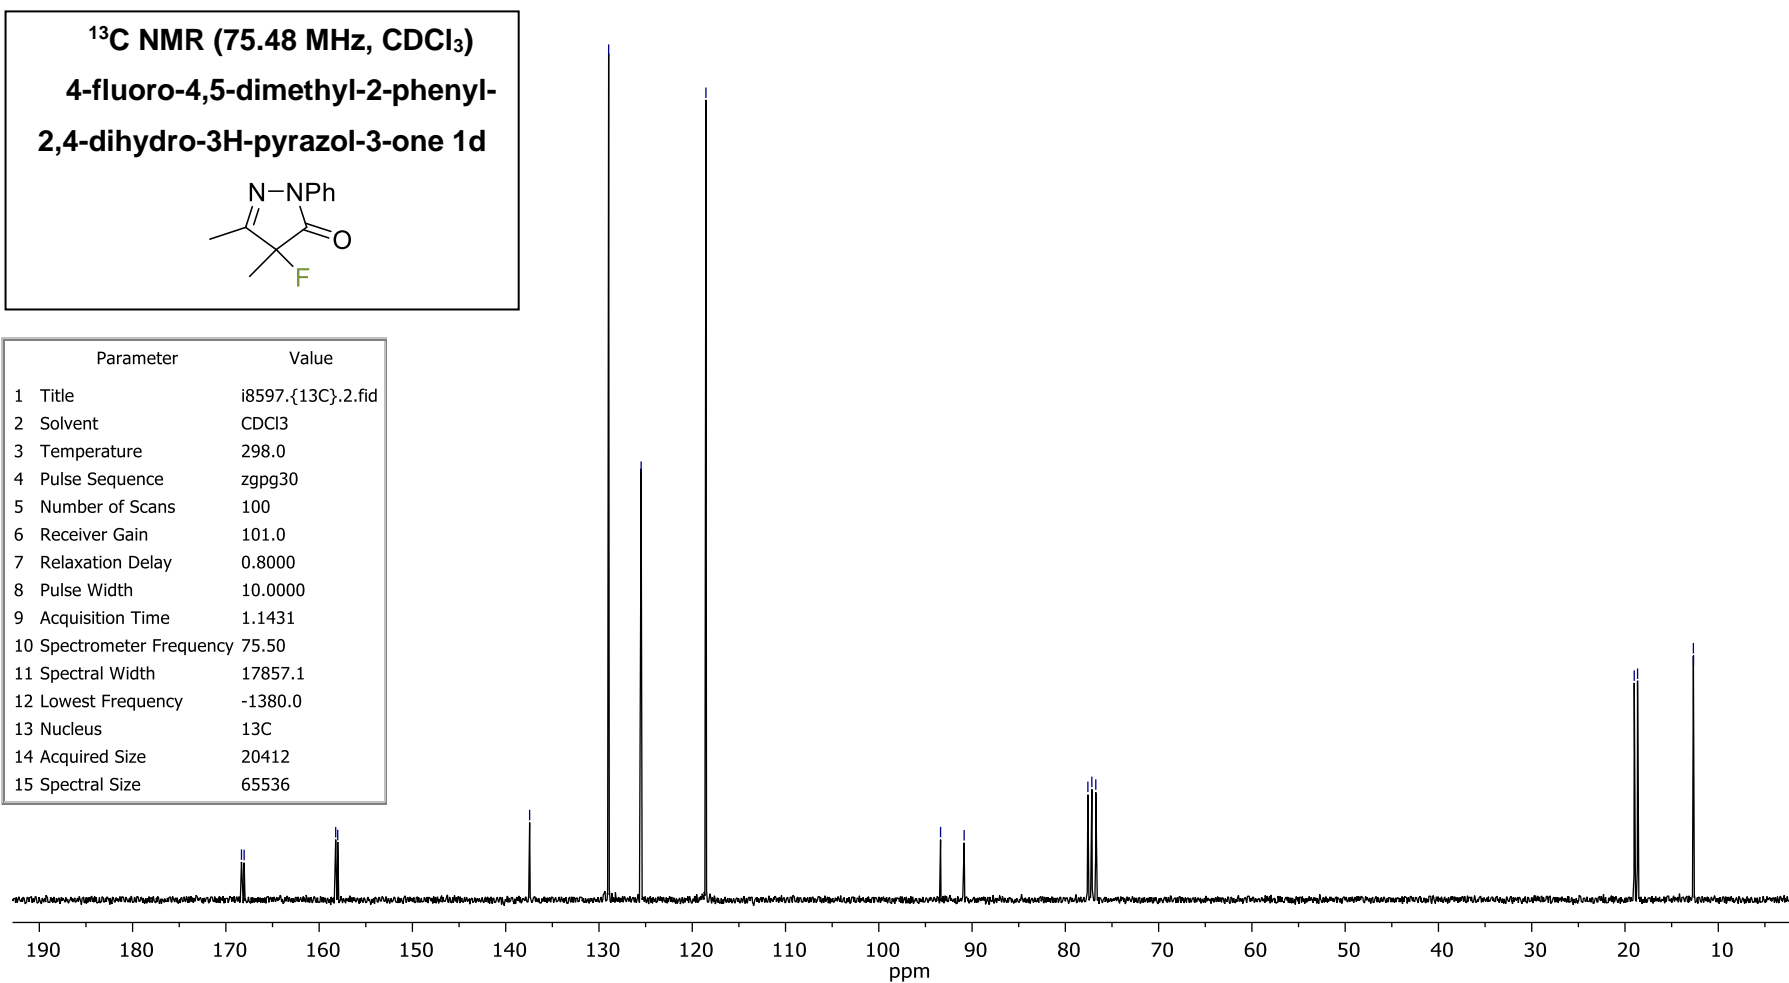

**<sup>19</sup>F NMR (282.47 MHz, CDCl<sub>3</sub>)**  
**4-fluoro-4,5-dimethyl-2-phenyl-**  
**2,4-dihydro-3H-pyrazol-3-one 1d**

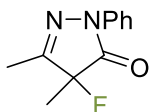

|    |                        |                               |
|----|------------------------|-------------------------------|
| 1  | Title                  | BUD495- <sup>19</sup> F-2.fid |
| 2  | Solvent                | CDCl <sub>3</sub>             |
| 3  | Temperature            | 298.0                         |
| 4  | Pulse Sequence         | zg30                          |
| 5  | Number of Scans        | 16                            |
| 6  | Receiver Gain          | 101.0                         |
| 7  | Relaxation Delay       | 2.0000                        |
| 8  | Pulse Width            | 15.0000                       |
| 9  | Acquisition Time       | 1.8677                        |
| 10 | Spectrometer Frequency | 282.47                        |
| 11 | Spectral Width         | 68493.2                       |
| 12 | Lowest Frequency       | -62496.4                      |
| 13 | Nucleus                | <sup>19</sup> F               |
| 14 | Acquired Size          | 127924                        |
| 15 | Spectral Size          | 262144                        |

-166.60  
-166.68  
-166.76  
-166.85

0 -10 -20 -30 -40 -50 -60 -70 -80 -90 -100 -110 -120 -130 -140 -150 -160 -170 -180 -190 -200 -210  
ppm

# Display Report

## Analysis Info

Analysis Name D:\Data\Chizhov\Terentiev\Budnikov\bud-925\_&clblow.d Acquisition Date 24.09.2021 16:30:40  
Method tune\_low.m Operator BDAL@DE  
Sample Name /TERN BUD-925 Instrument / Ser# microTOF 10248  
Comment CH3OH 1000 %, dil. 2000, calibrant added

## Acquisition Parameter

|             |            |                      |          |                  |           |
|-------------|------------|----------------------|----------|------------------|-----------|
| Source Type | ESI        | Ion Polarity         | Positive | Set Nebulizer    | 0.4 Bar   |
| Focus       | Not active | Set Capillary        | 4500 V   | Set Dry Heater   | 180 °C    |
| Scan Begin  | 50 m/z     | Set End Plate Offset | -500 V   | Set Dry Gas      | 4.0 l/min |
| Scan End    | 3000 m/z   |                      |          | Set Divert Valve | Waste     |

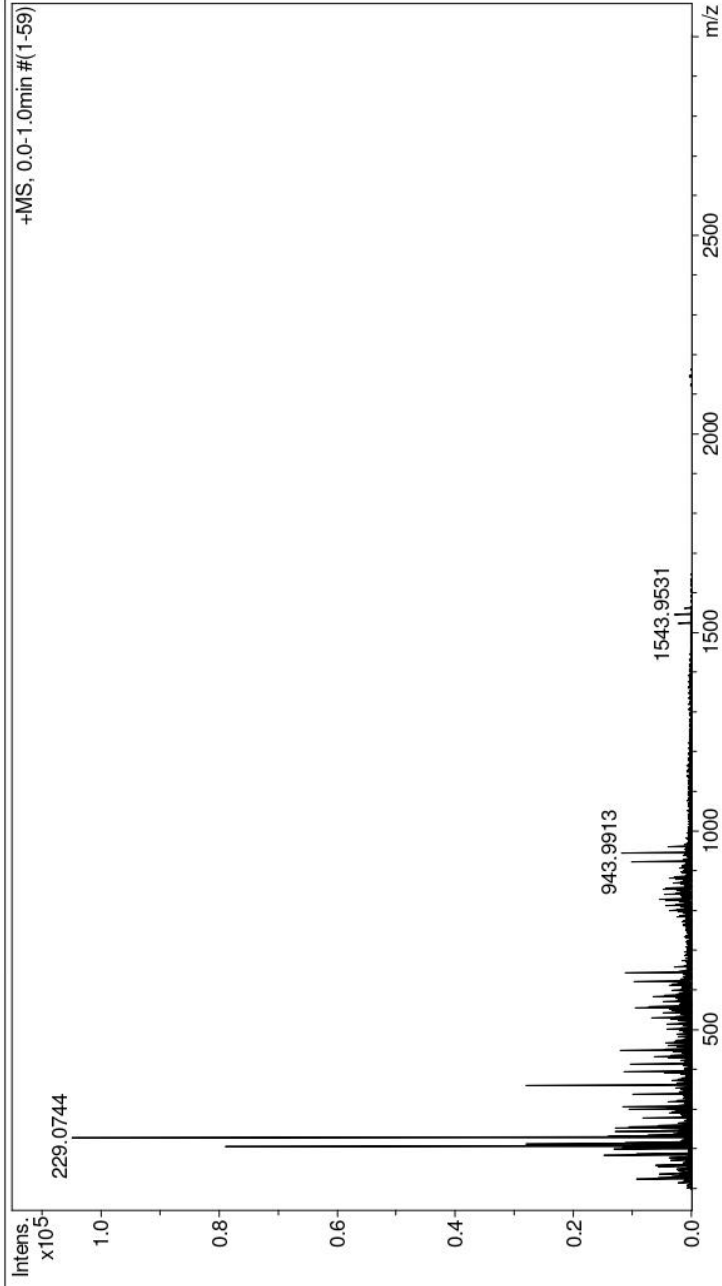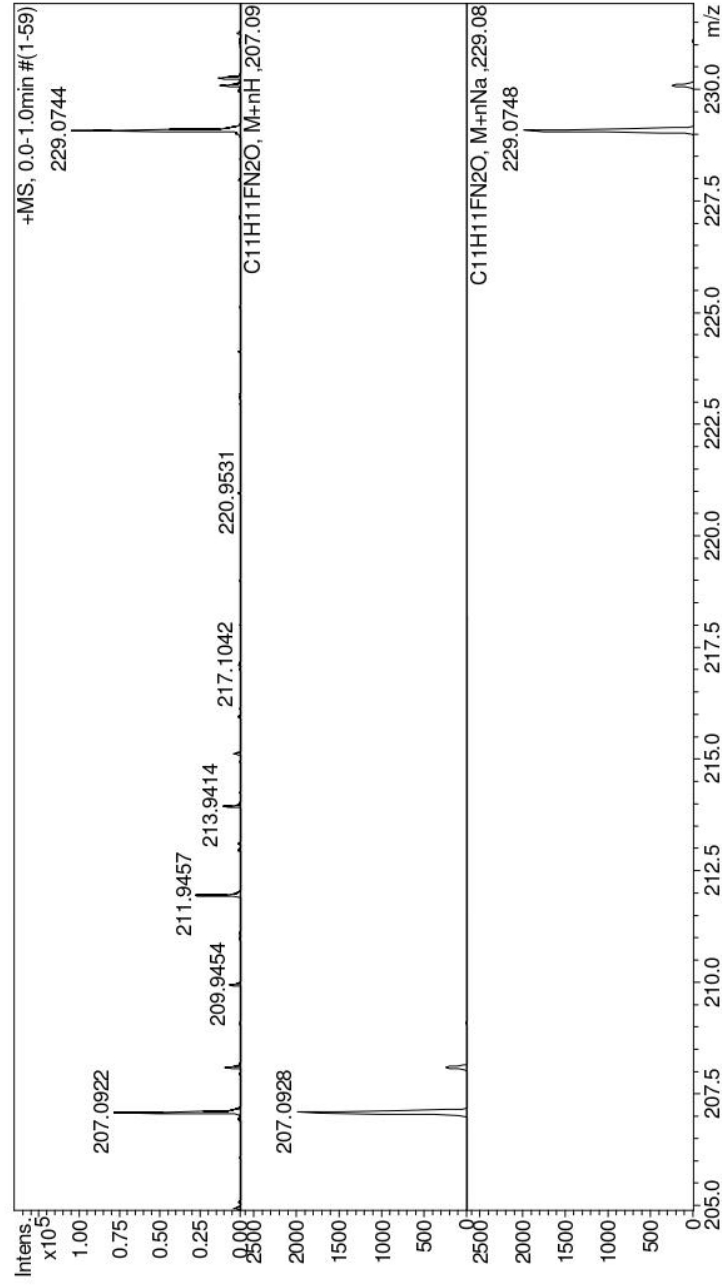

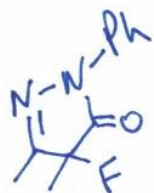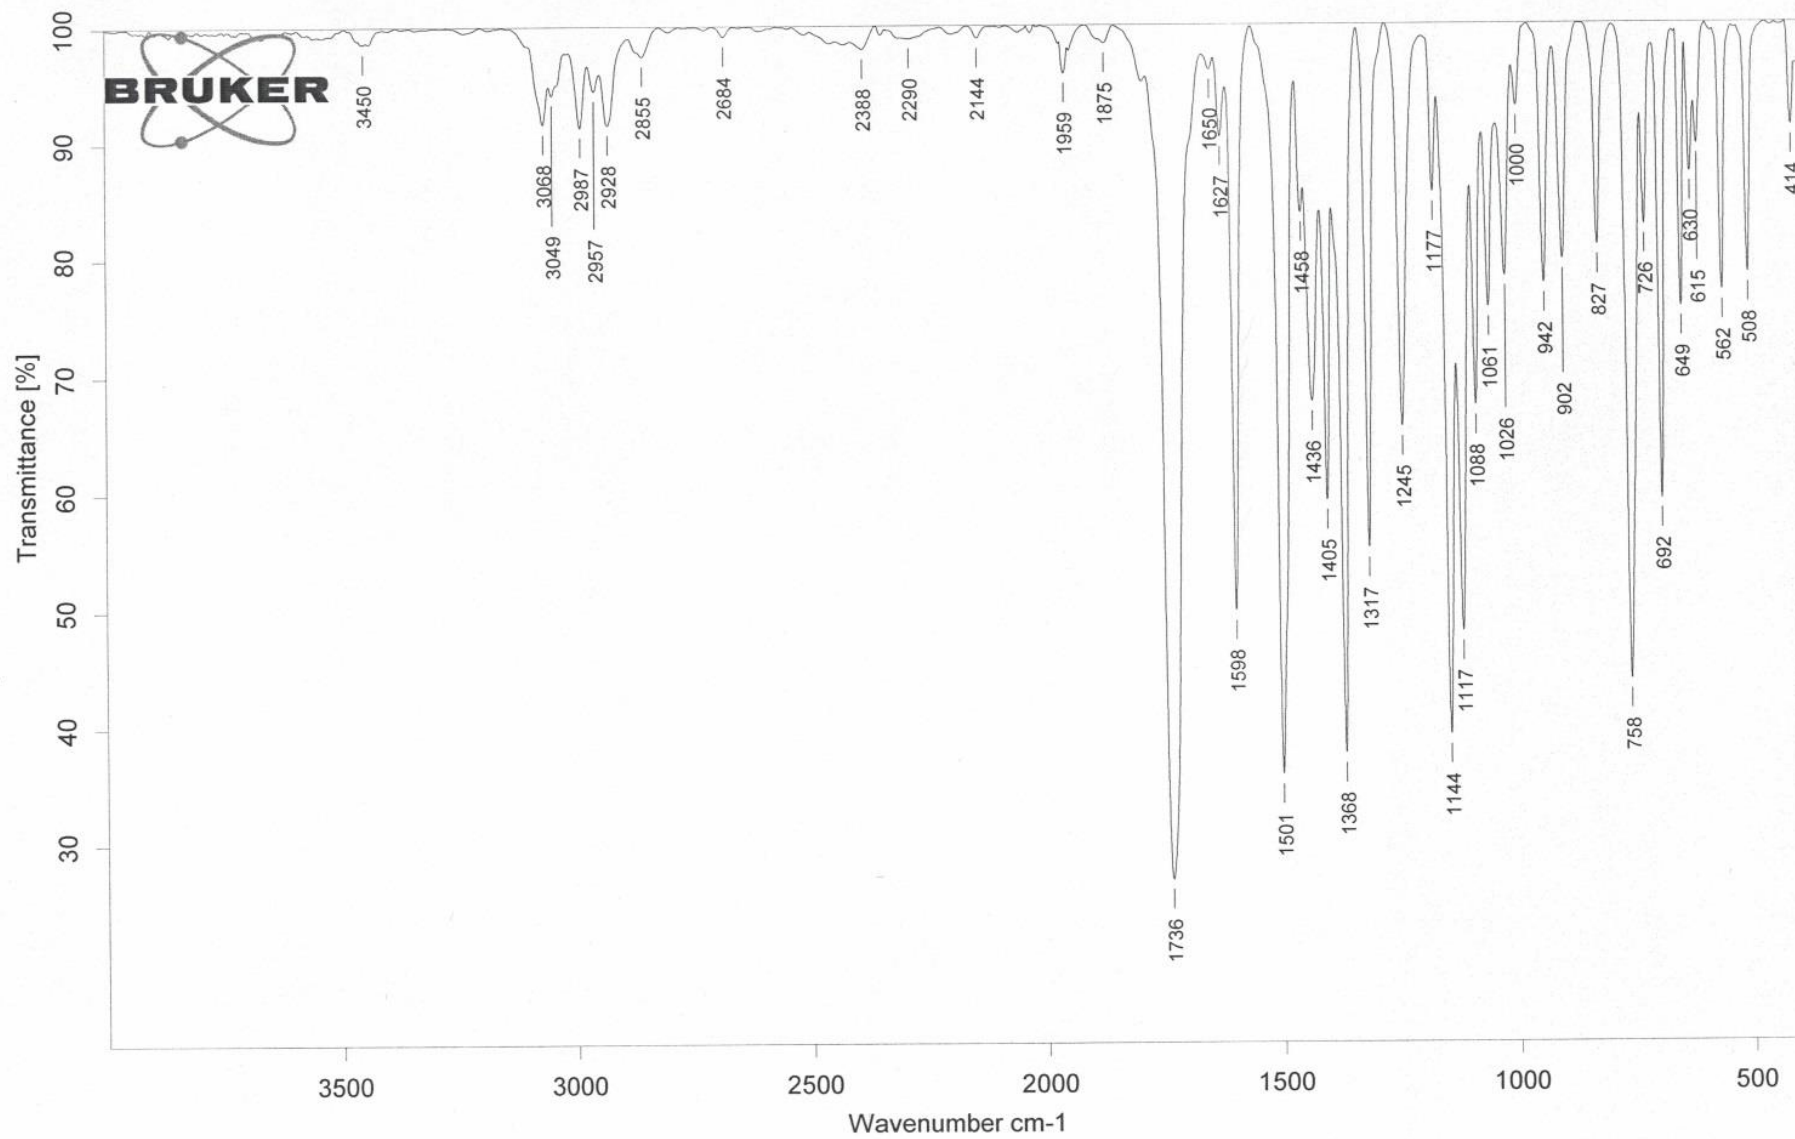

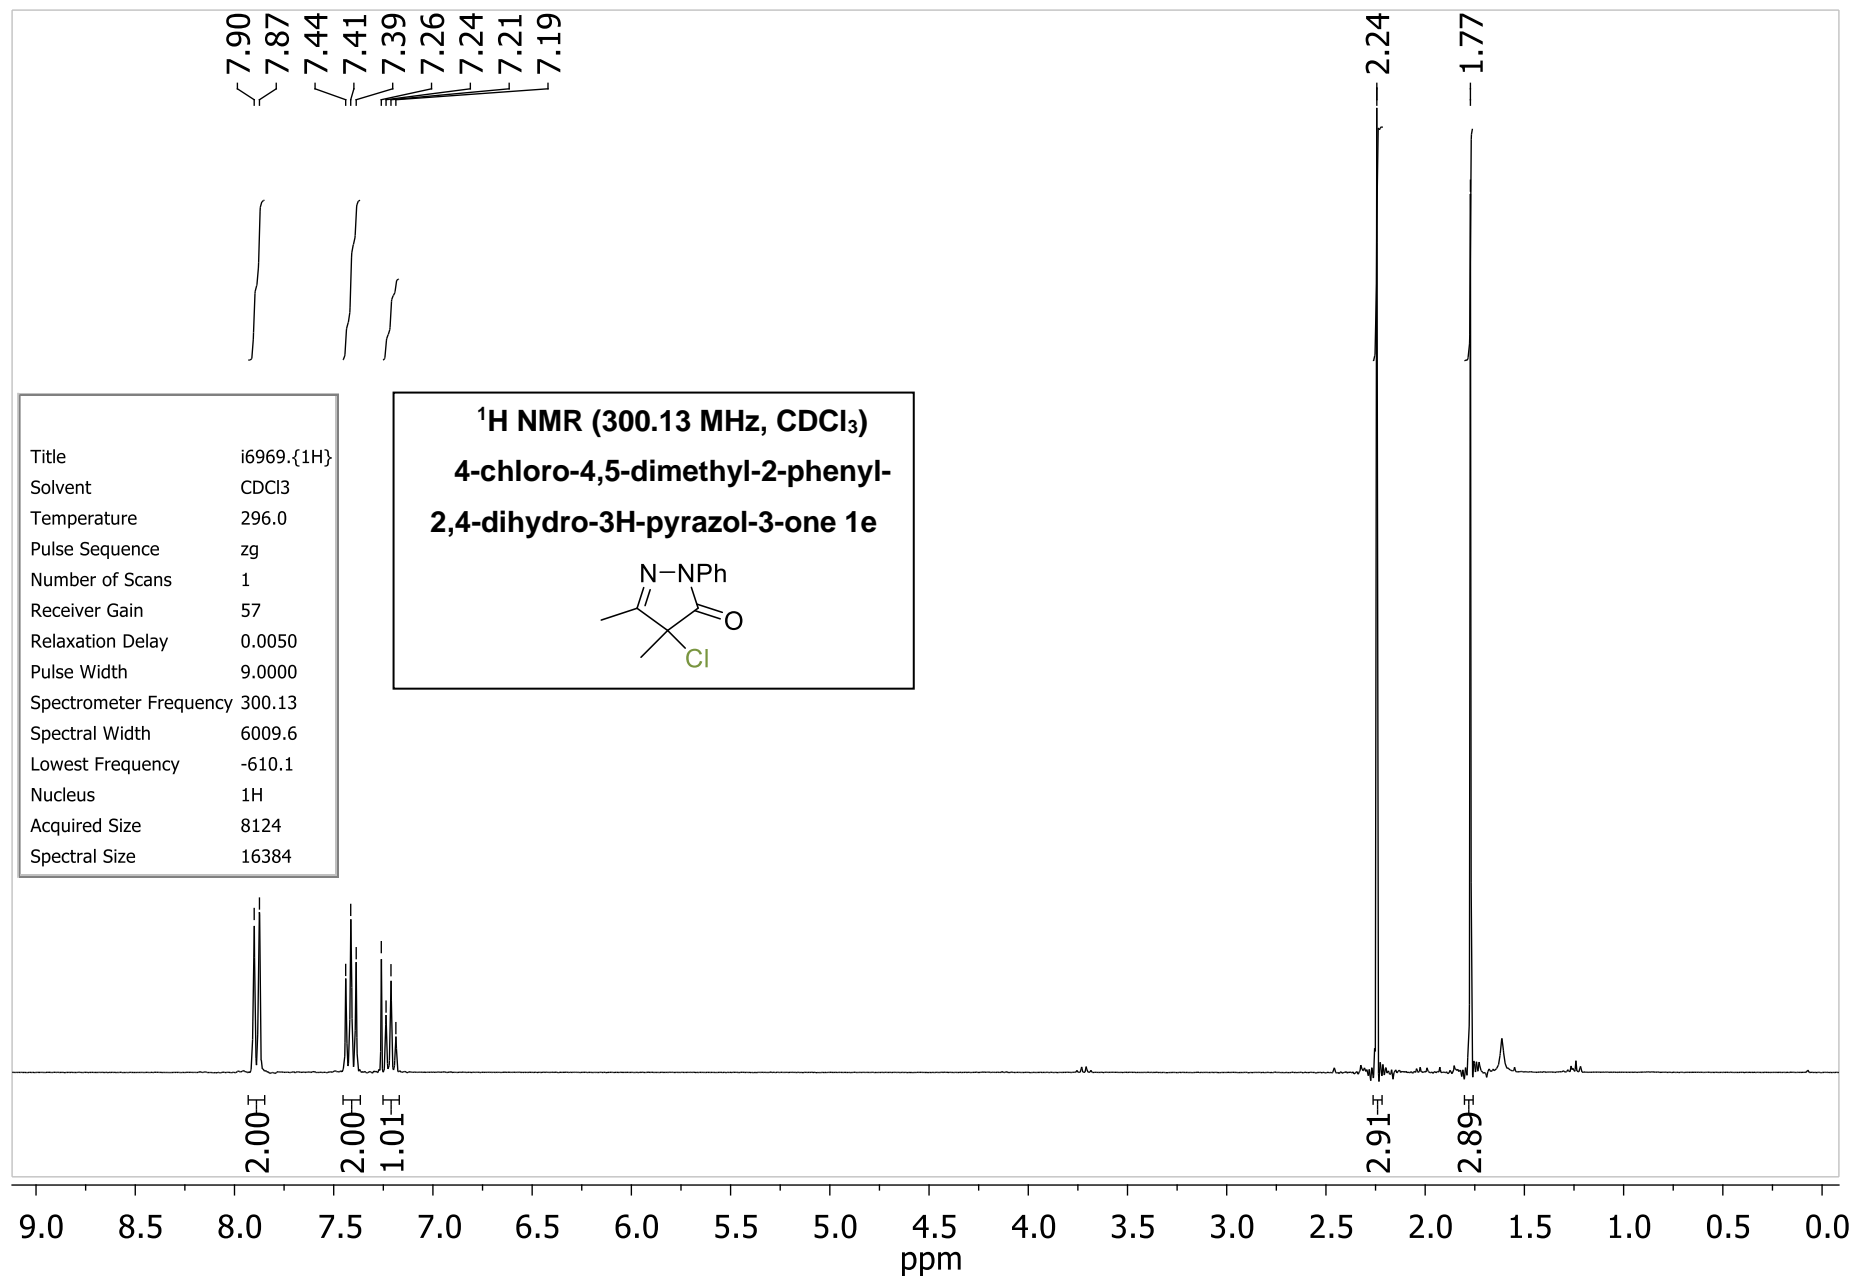



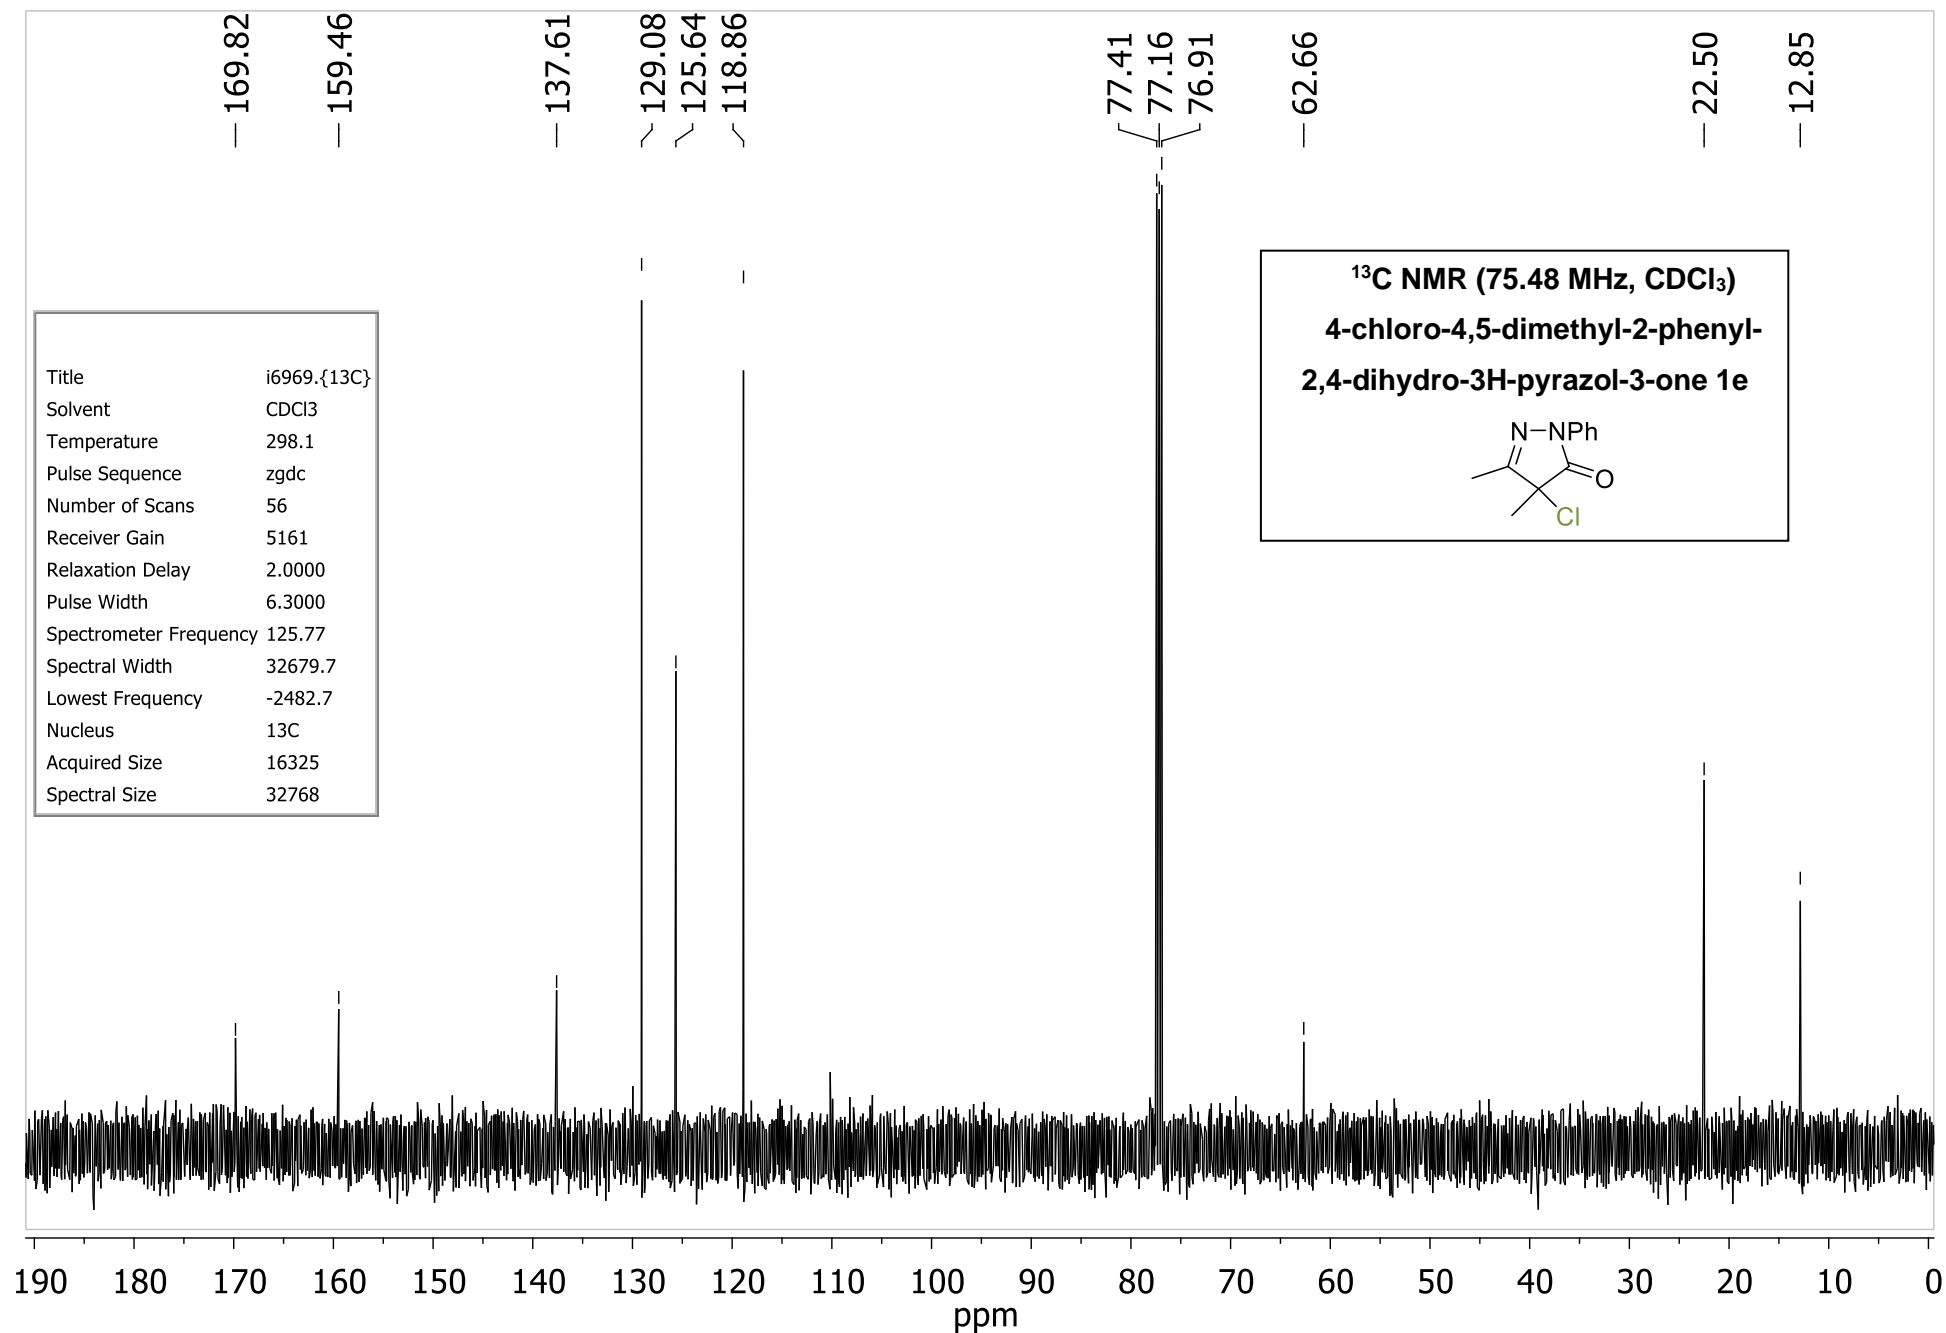

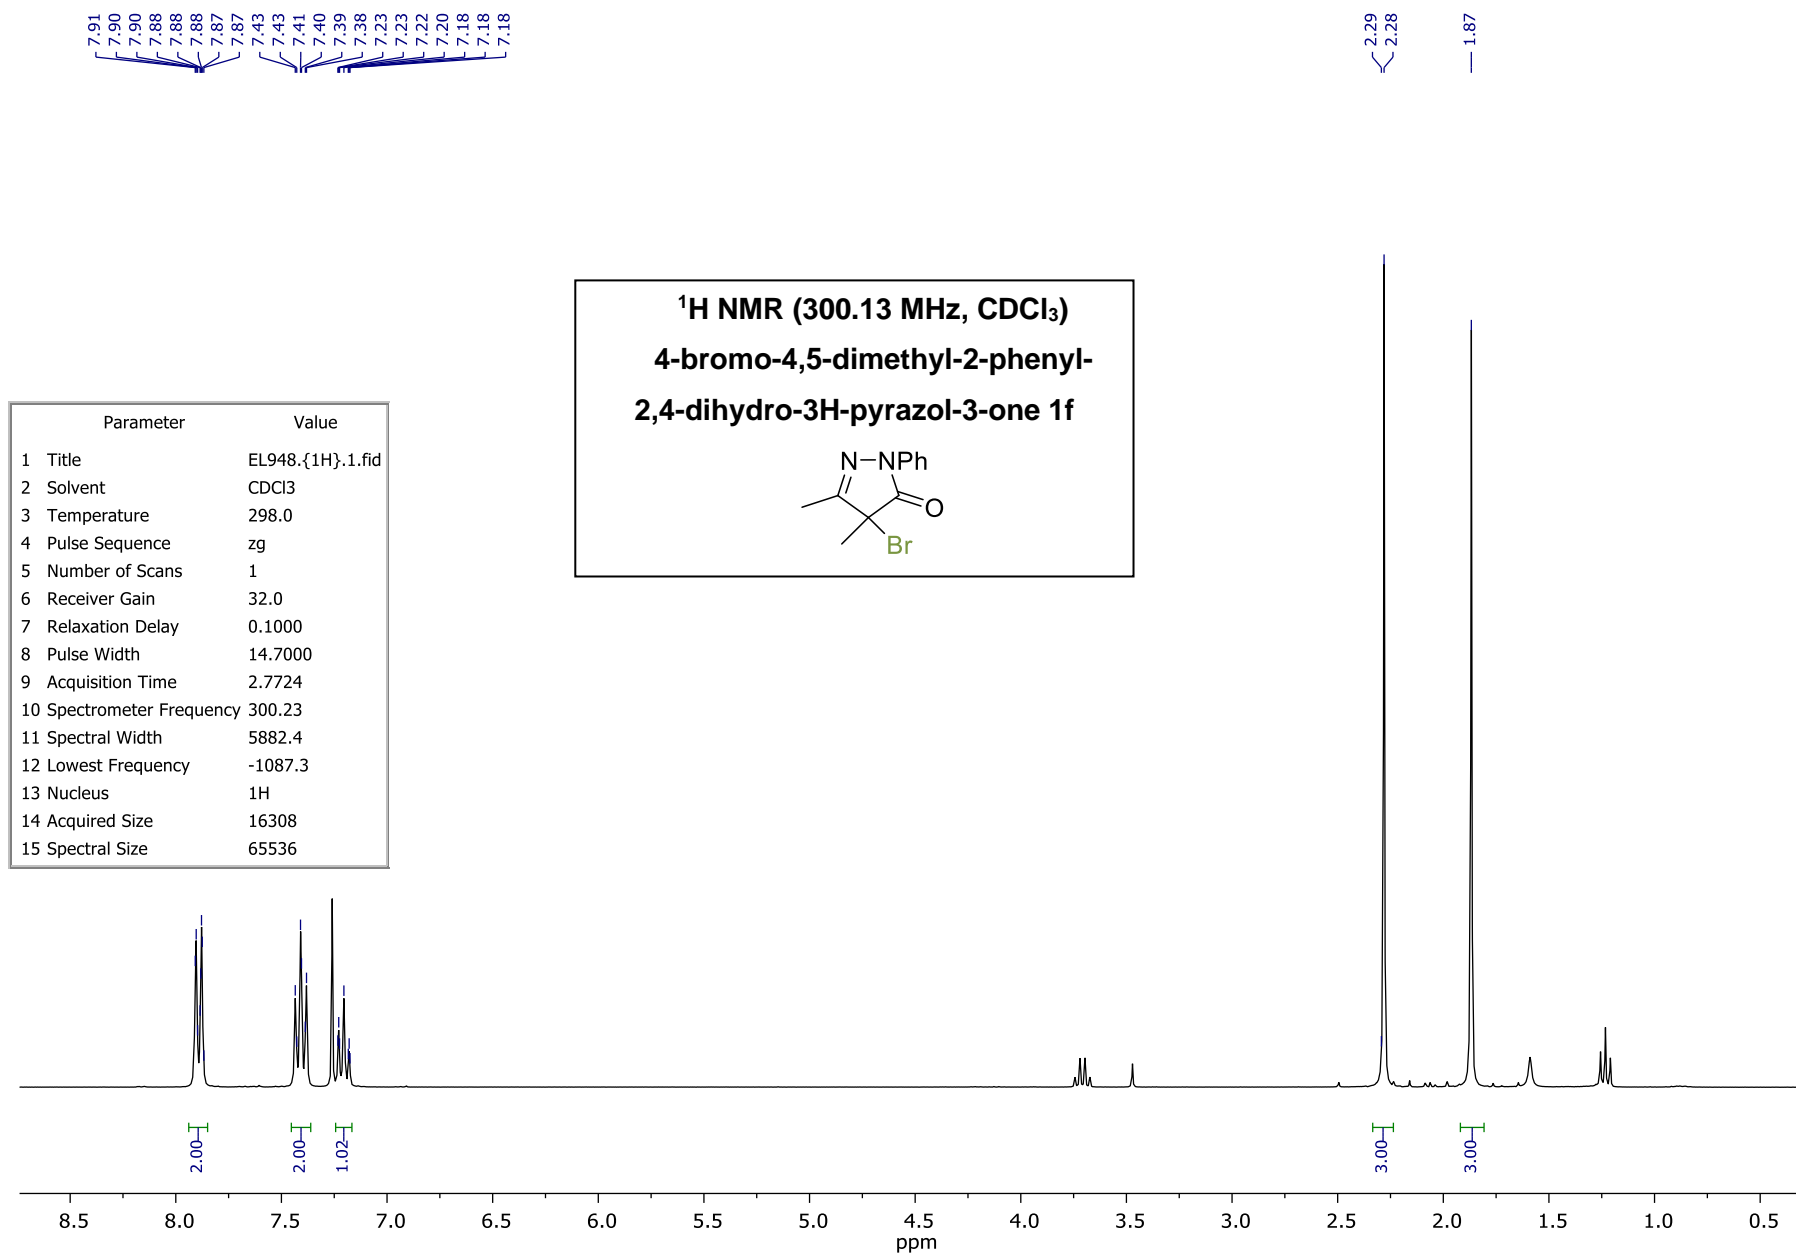

**$^{13}\text{C}$  NMR (75.48 MHz,  $\text{CDCl}_3$ )**  
**4-bromo-4,5-dimethyl-2-phenyl-**  
**2,4-dihydro-3H-pyrazol-3-one 1f**

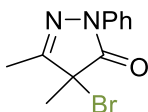

| Parameter                 | Value                           |
|---------------------------|---------------------------------|
| 1 Title                   | EL948.{ $^{13}\text{C}$ }.2.fid |
| 2 Solvent                 | $\text{CDCl}_3$                 |
| 3 Temperature             | 298.0                           |
| 4 Pulse Sequence          | zgpg30                          |
| 5 Number of Scans         | 256                             |
| 6 Receiver Gain           | 101.0                           |
| 7 Relaxation Delay        | 0.8000                          |
| 8 Pulse Width             | 9.9000                          |
| 9 Acquisition Time        | 1.1431                          |
| 10 Spectrometer Frequency | 75.50                           |
| 11 Spectral Width         | 17857.1                         |
| 12 Lowest Frequency       | -1379.3                         |
| 13 Nucleus                | $^{13}\text{C}$                 |
| 14 Acquired Size          | 20412                           |
| 15 Spectral Size          | 65536                           |

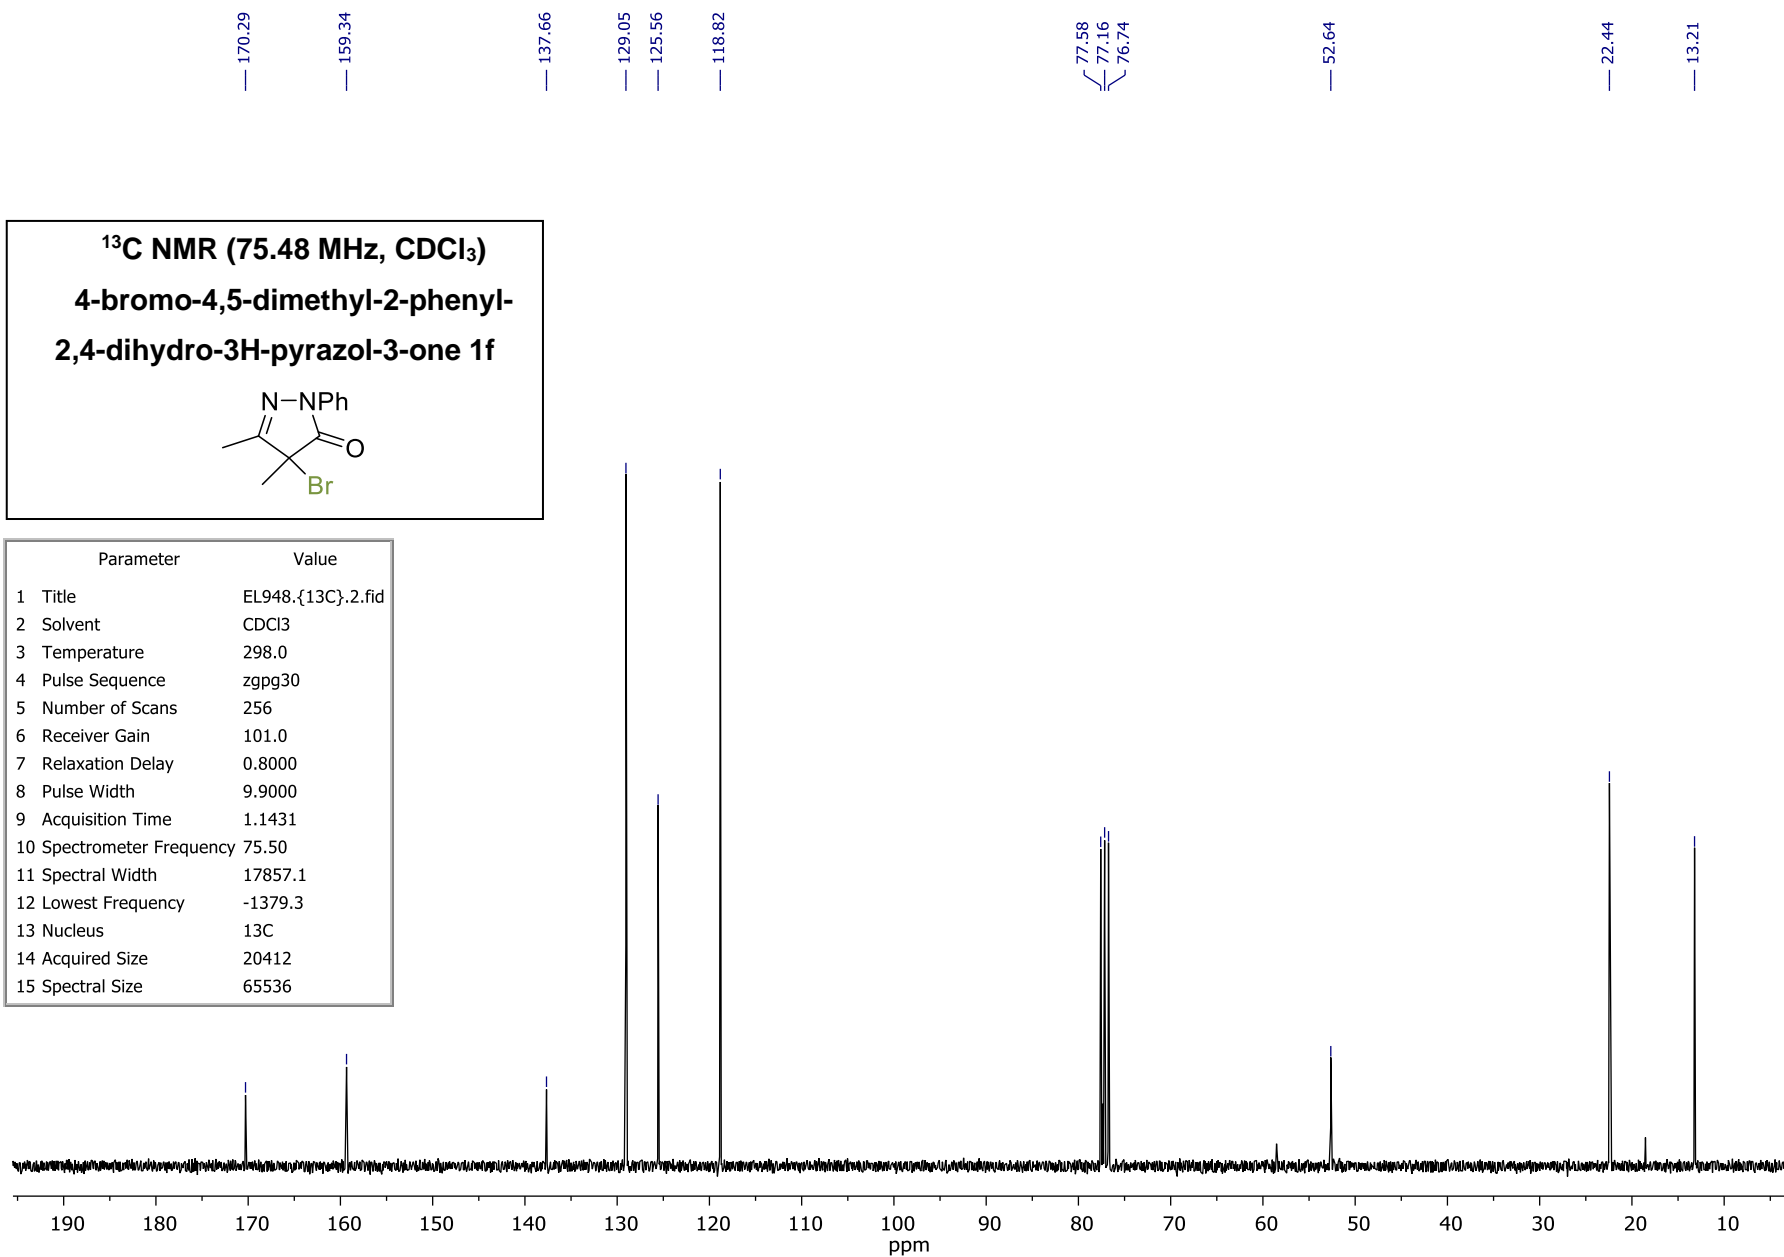

**<sup>1</sup>H NMR (300.13 MHz, CDCl<sub>3</sub>)**  
**4,4-difluoro-5-methyl-2-phenyl-**  
**2,4-dihydro-3H-pyrazol-3-one 2d**

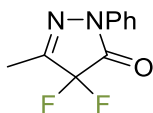

|    |                        |                   |
|----|------------------------|-------------------|
| 1  | Title                  | BUD327.{1H}.1.fid |
| 2  | Solvent                | CDCl3             |
| 3  | Temperature            | 298.6             |
| 4  | Pulse Sequence         | zg                |
| 5  | Number of Scans        | 1                 |
| 6  | Receiver Gain          | 25.4              |
| 7  | Relaxation Delay       | 0.0050            |
| 8  | Pulse Width            | 9.0000            |
| 9  | Acquisition Time       | 1.3518            |
| 10 | Spectrometer Frequency | 300.13            |
| 11 | Spectral Width         | 6009.6            |
| 12 | Lowest Frequency       | -627.4            |
| 13 | Nucleus                | 1H                |
| 14 | Acquired Size          | 8124              |
| 15 | Spectral Size          | 65536             |

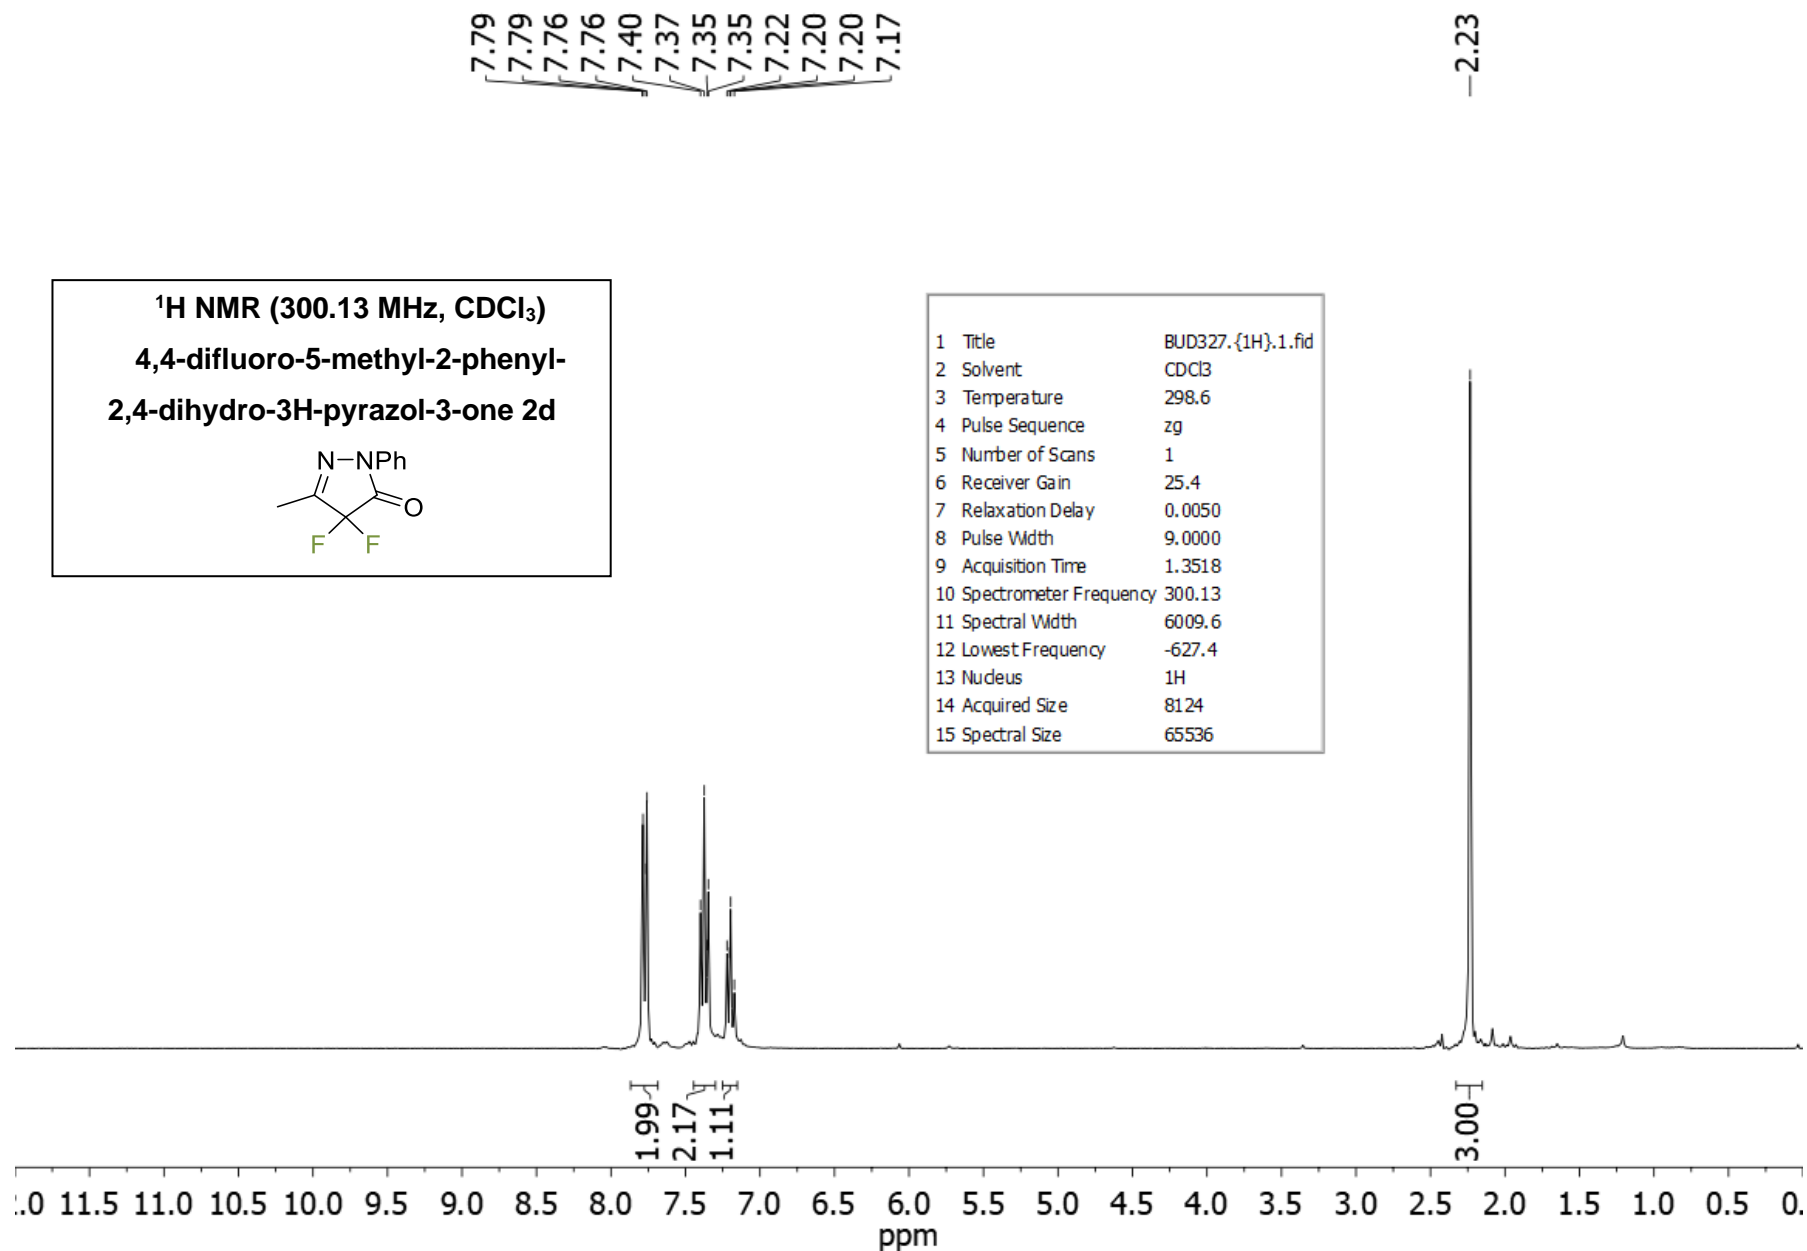

<sup>13</sup>C NMR (75.48 MHz, CDCl<sub>3</sub>)

4,4-difluoro-5-methyl-2-phenyl-  
2,4-dihydro-3H-pyrazol-3-one 2d

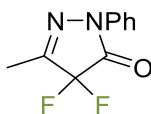

159.63  
159.23  
158.84  
152.25  
151.95  
151.64

136.76  
129.22  
126.33  
118.61  
111.56  
108.15  
104.75

77.58  
77.16  
76.74

11.80

|    |                        |                     |
|----|------------------------|---------------------|
| 1  | Title                  | BUD327.{13C}.13.fid |
| 2  | Solvent                | CDCl3               |
| 3  | Temperature            | 299.0               |
| 4  | Pulse Sequence         | zgpg30              |
| 5  | Number of Scans        | 470                 |
| 6  | Receiver Gain          | 3250.0              |
| 7  | Relaxation Delay       | 1.0000              |
| 8  | Pulse Width            | 13.0000             |
| 9  | Acquisition Time       | 0.9002              |
| 10 | Spectrometer Frequency | 75.48               |
| 11 | Spectral Width         | 18115.9             |
| 12 | Lowest Frequency       | -747.8              |
| 13 | Nucleus                | 13C                 |
| 14 | Acquired Size          | 16308               |
| 15 | Spectral Size          | 65536               |

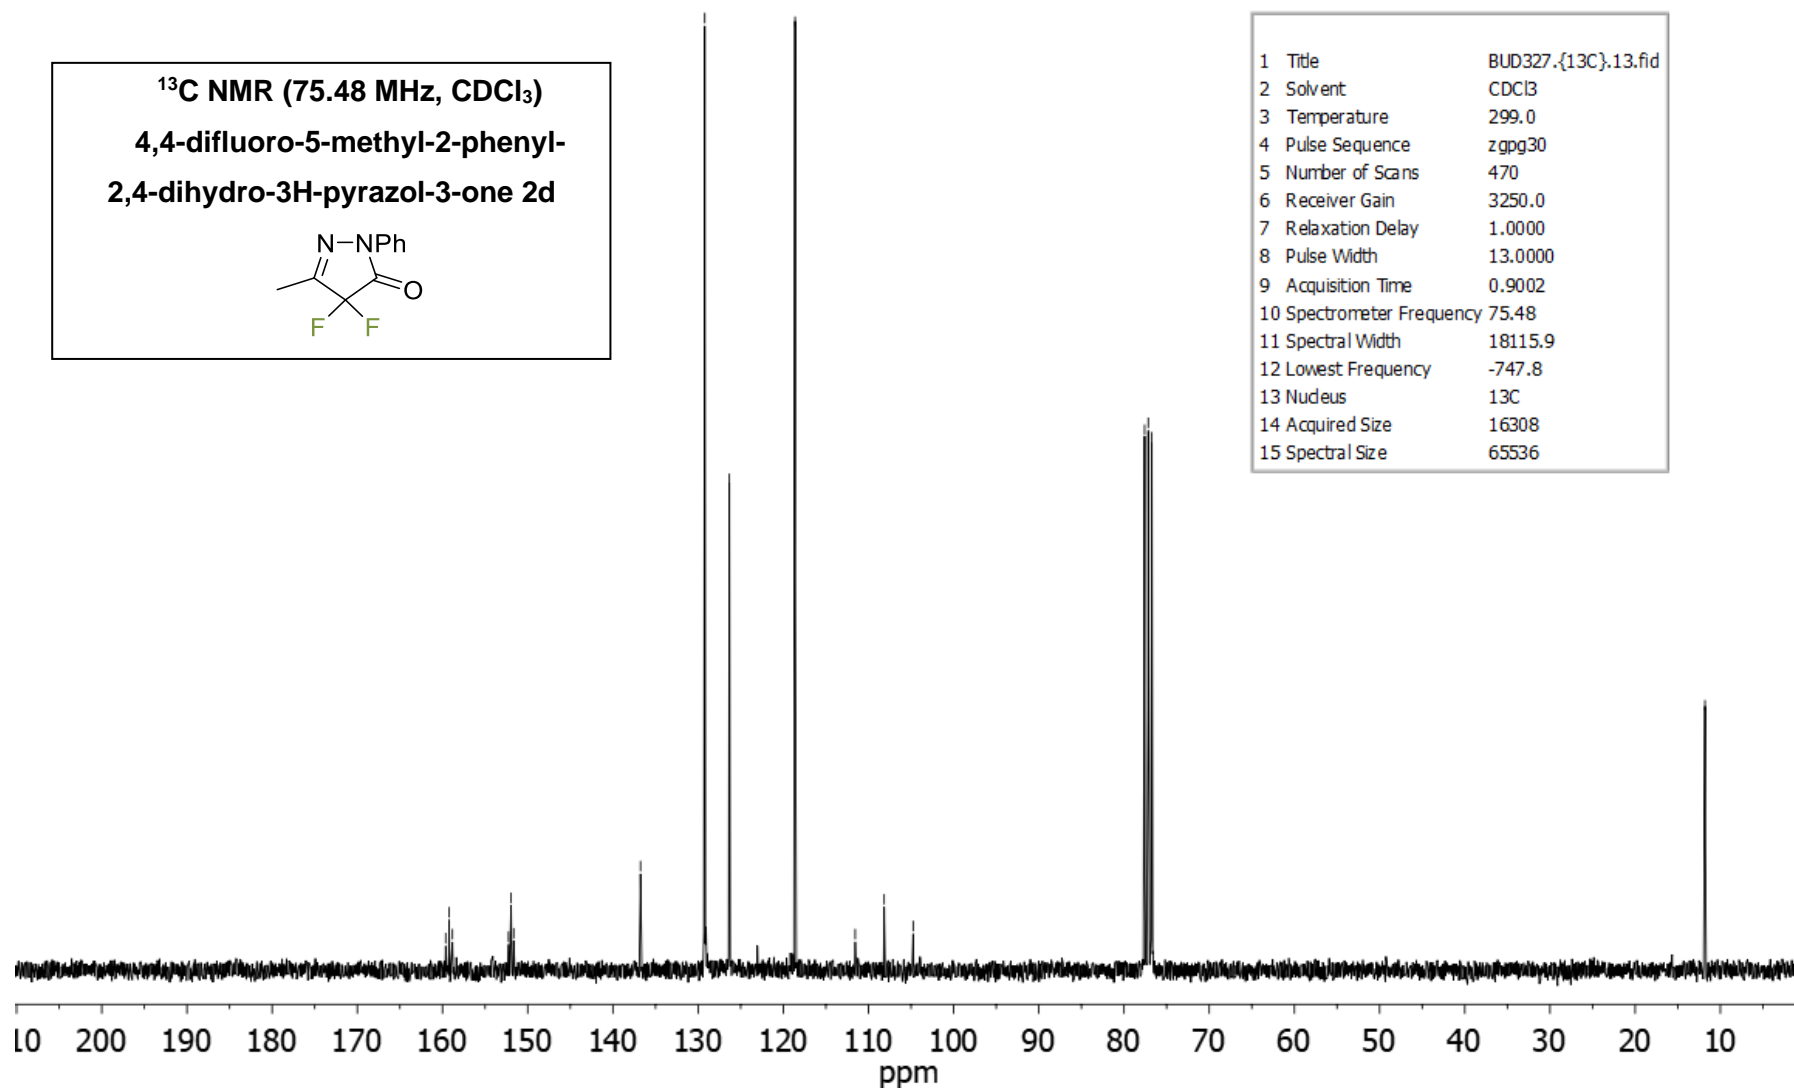

**<sup>19</sup>F NMR (282.39 MHz, CDCl<sub>3</sub>)**  
**4,4-difluoro-5-methyl-2-phenyl-**  
**2,4-dihydro-3H-pyrazol-3-one 2d**

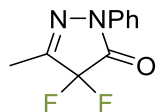

— -123.13

|    |                        |                     |
|----|------------------------|---------------------|
| 1  | Title                  | BUD327.{19F}.19.fid |
| 2  | Solvent                | CDCl3               |
| 3  | Temperature            | 298.7               |
| 4  | Pulse Sequence         | zg                  |
| 5  | Number of Scans        | 1                   |
| 6  | Receiver Gain          | 2300.0              |
| 7  | Relaxation Delay       | 0.3000              |
| 8  | Pulse Width            | 6.0000              |
| 9  | Acquisition Time       | 0.2449              |
| 10 | Spectrometer Frequency | 282.39              |
| 11 | Spectral Width         | 138888.9            |
| 12 | Lowest Frequency       | -83785.3            |
| 13 | Nucleus                | 19F                 |
| 14 | Acquired Size          | 34018               |
| 15 | Spectral Size          | 131072              |

180 160 140 120 100 80 60 40 20 0 -20 -40 -60 -80 -100 -120 -140 -160 -180 -200 -220 -240 -260 -280  
ppm

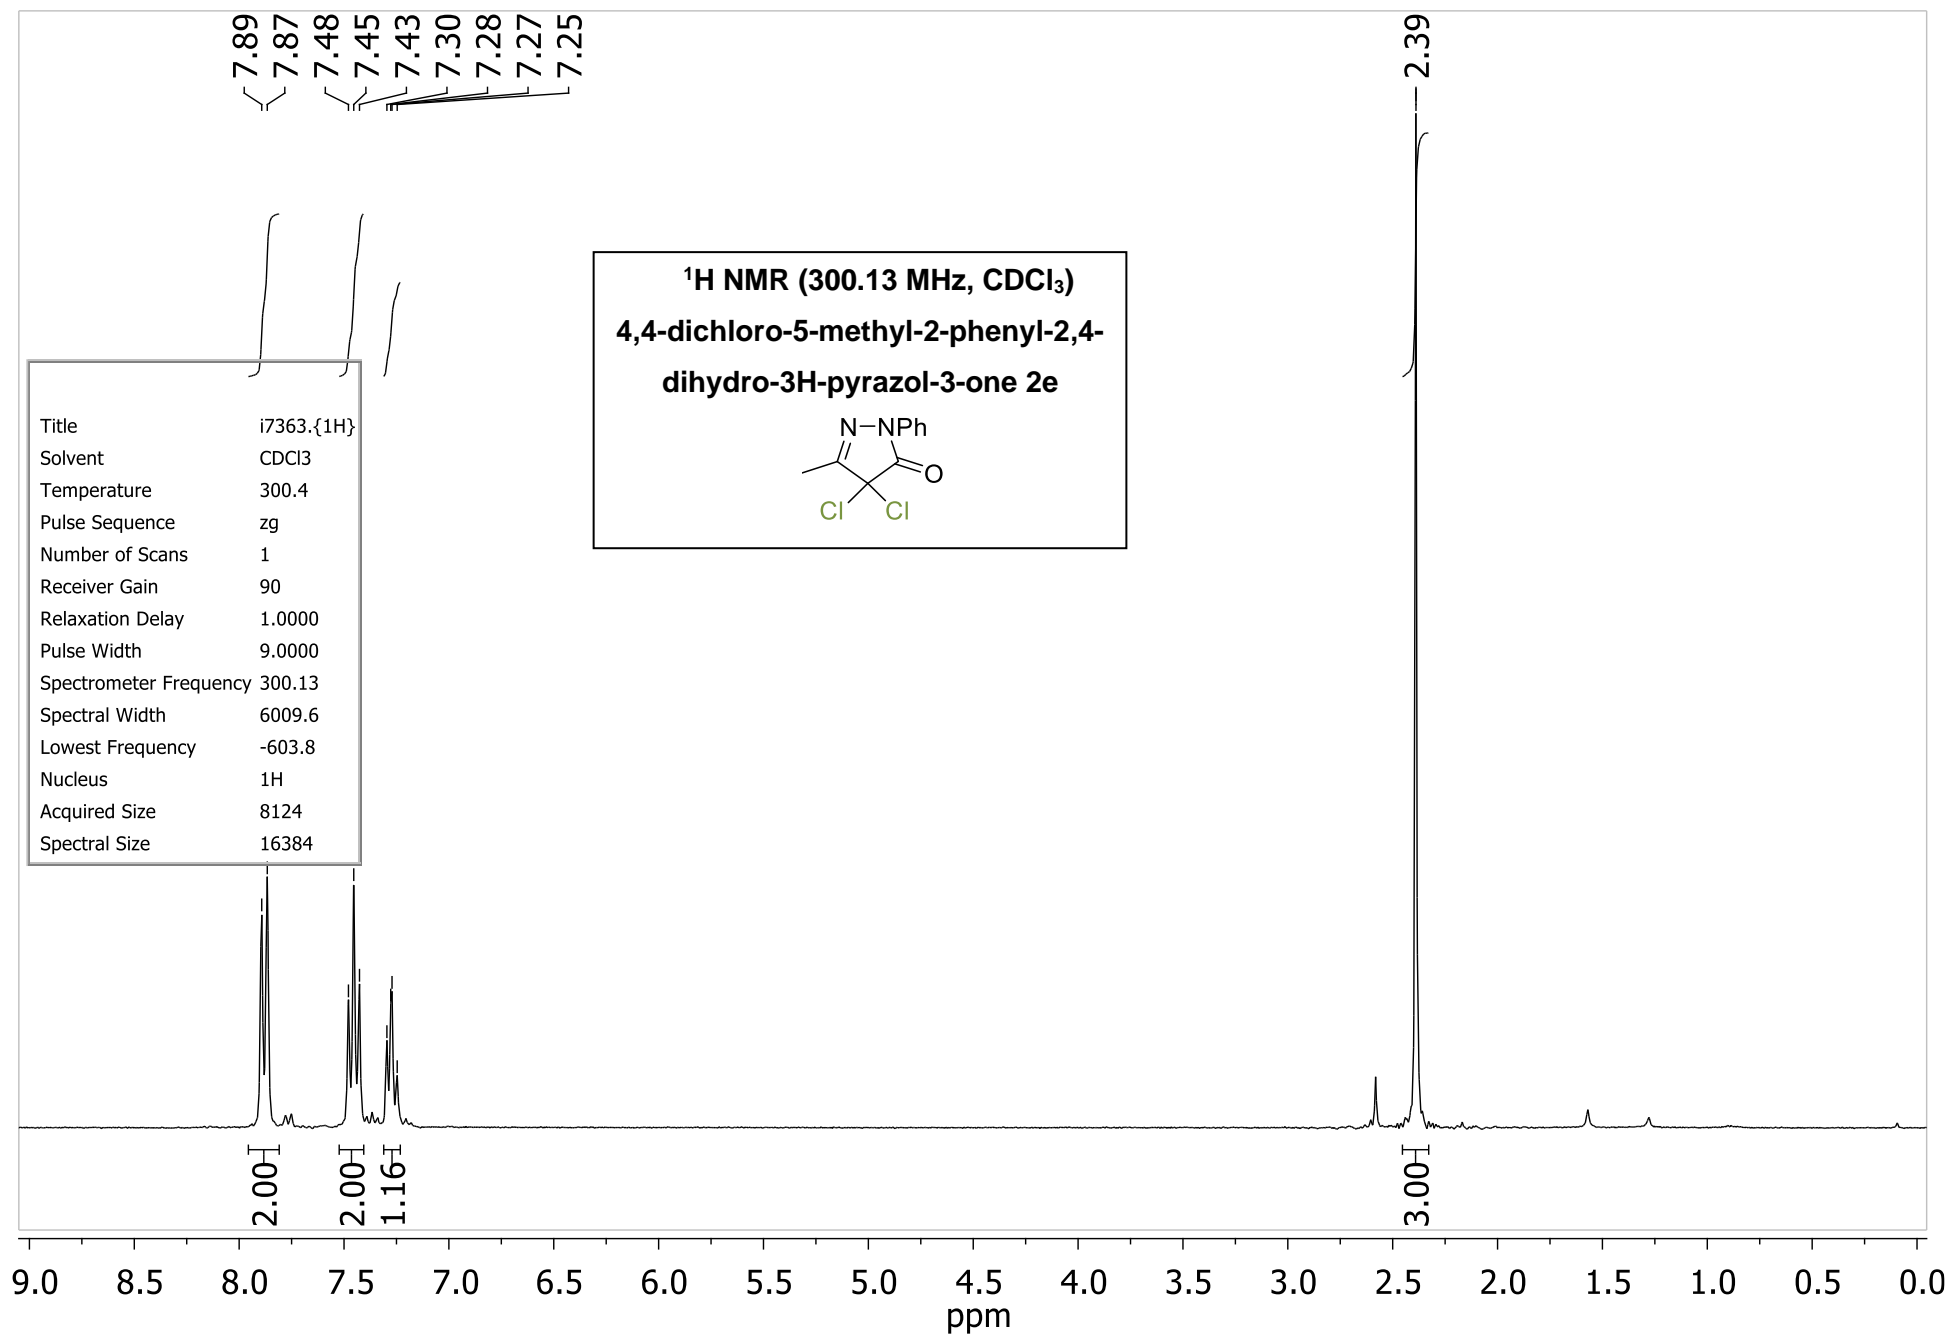

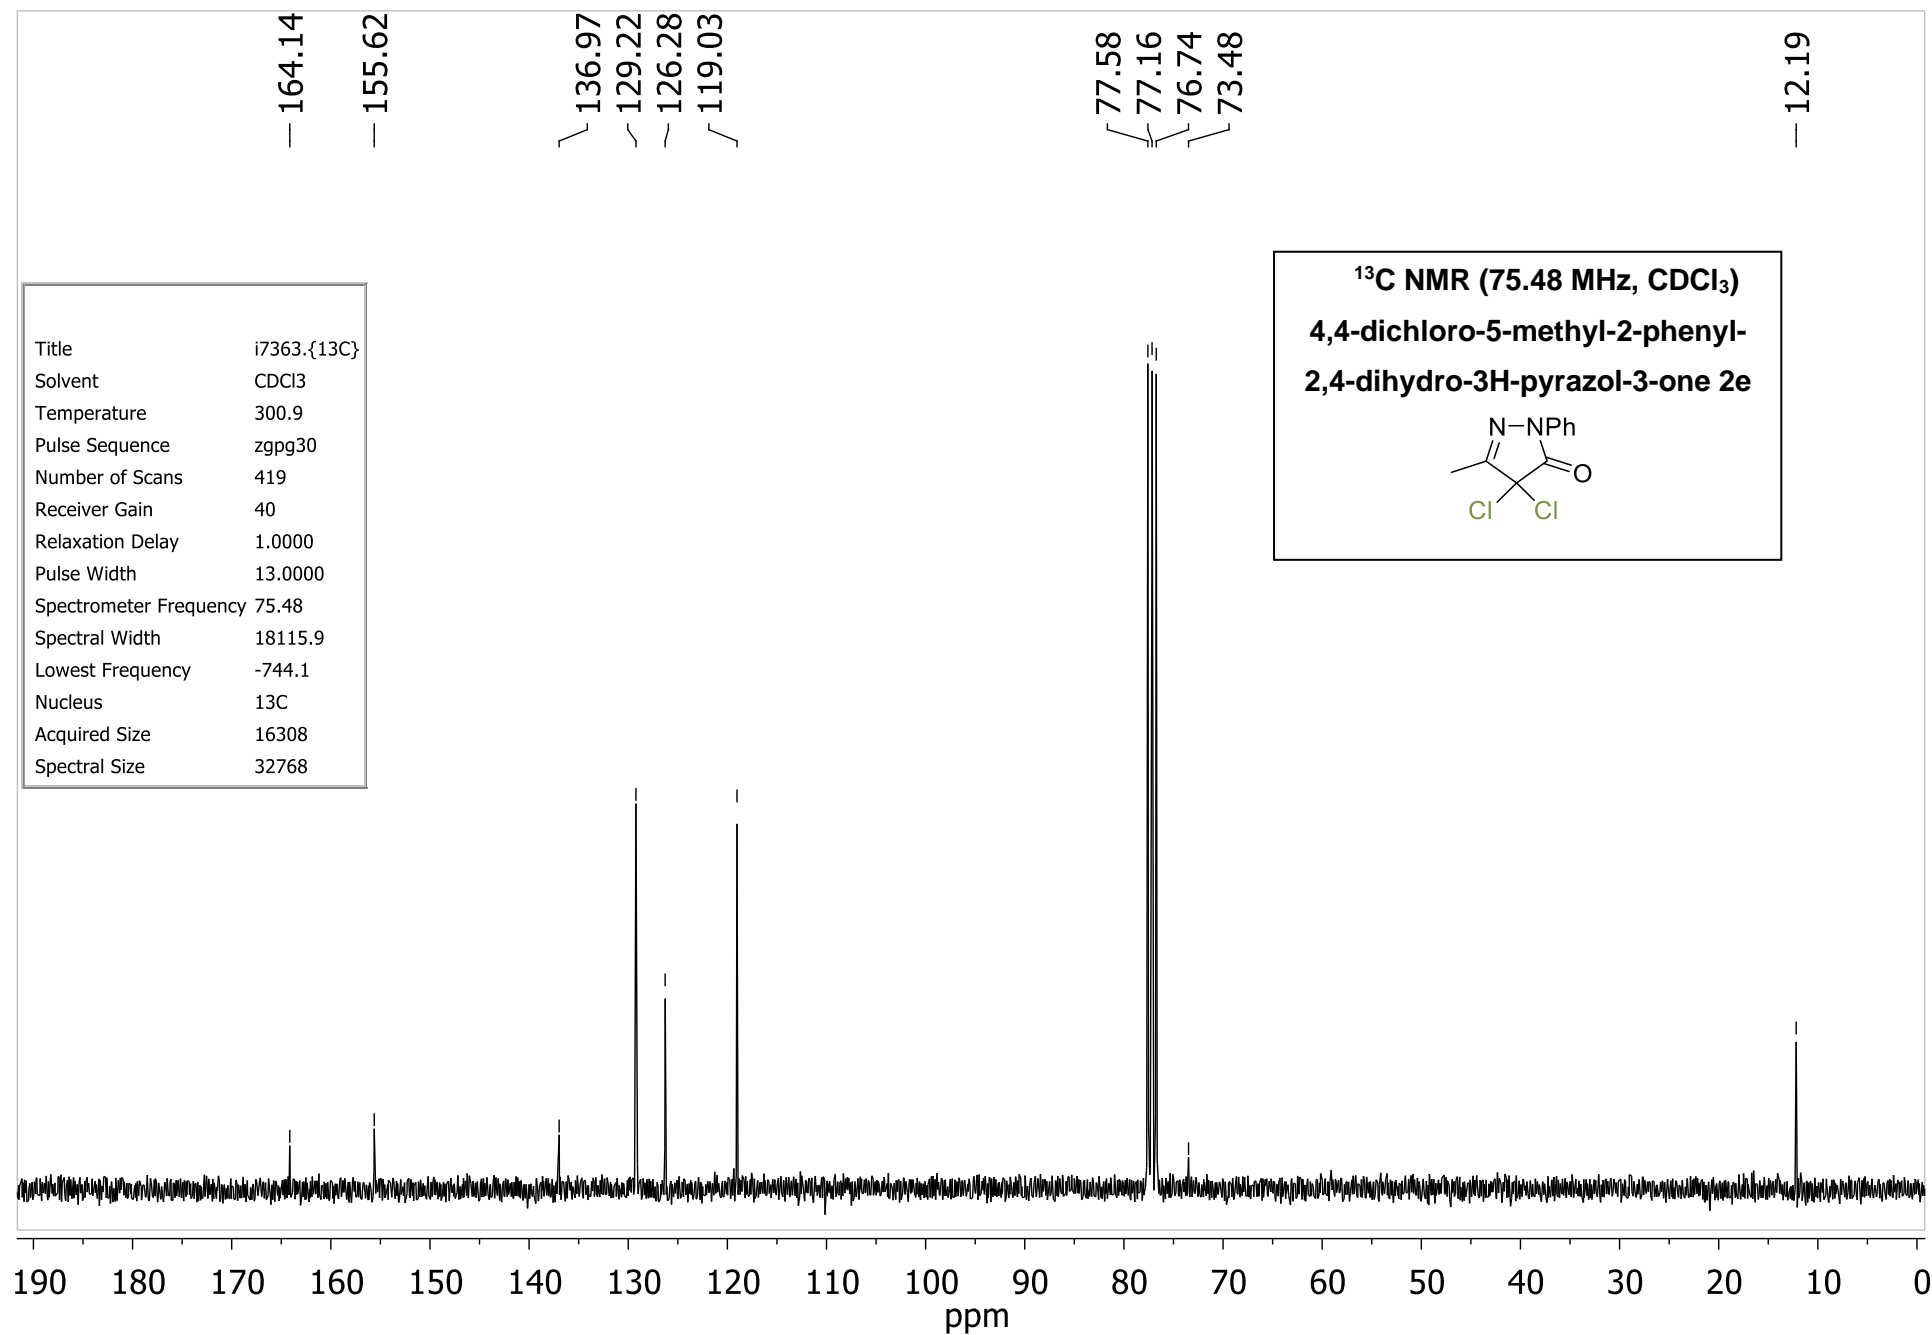



7.89  
7.88  
7.87  
7.85  
7.46  
7.45  
7.43  
7.41  
7.40  
7.27  
7.26  
7.24  
7.22

2.44

| Parameter                 | Value            |
|---------------------------|------------------|
| 1 Title                   | EL924.{1H}.1.fid |
| 2 Solvent                 | CDCl3            |
| 3 Temperature             | 300.2            |
| 4 Pulse Sequence          | zg               |
| 5 Number of Scans         | 1                |
| 6 Receiver Gain           | 71.8             |
| 7 Relaxation Delay        | 0.0050           |
| 8 Pulse Width             | 9.0000           |
| 9 Acquisition Time        | 1.3518           |
| 10 Spectrometer Frequency | 300.13           |
| 11 Spectral Width         | 6009.6           |
| 12 Lowest Frequency       | -609.6           |
| 13 Nucleus                | 1H               |
| 14 Acquired Size          | 8124             |
| 15 Spectral Size          | 65536            |

**<sup>1</sup>H NMR (300.13 MHz, CDCl<sub>3</sub>)**  
**4,4-dibromo-5-methyl-2-phenyl-**  
**2,4-dihydro-3H-pyrazol-3-one 2f**

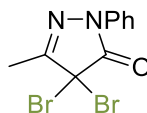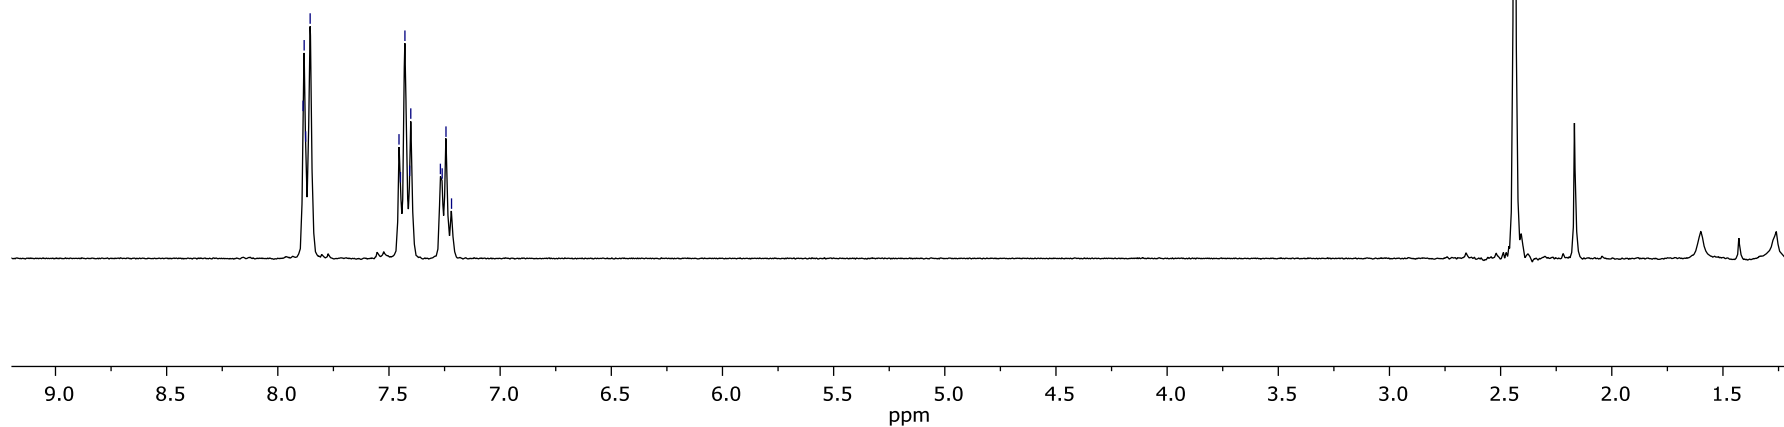

**$^{13}\text{C}$  NMR (75.48 MHz,  $\text{CDCl}_3$ )**  
**4,4-dibromo-5-methyl-2-phenyl-**  
**2,4-dihydro-3H-pyrazol-3-one 2f**

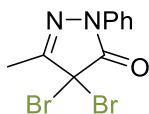

| Parameter                 | Value                            |
|---------------------------|----------------------------------|
| 1 Title                   | EL924.{ $^{13}\text{C}$ }.13.fid |
| 2 Solvent                 | $\text{CDCl}_3$                  |
| 3 Temperature             | 300.2                            |
| 4 Pulse Sequence          | zgpg60base                       |
| 5 Number of Scans         | 696                              |
| 6 Receiver Gain           | 3250.0                           |
| 7 Relaxation Delay        | 1.0000                           |
| 8 Pulse Width             | 14.3000                          |
| 9 Acquisition Time        | 0.9006                           |
| 10 Spectrometer Frequency | 75.48                            |
| 11 Spectral Width         | 18115.9                          |
| 12 Lowest Frequency       | -746.1                           |
| 13 Nucleus                | $^{13}\text{C}$                  |
| 14 Acquired Size          | 16316                            |
| 15 Spectral Size          | 65536                            |

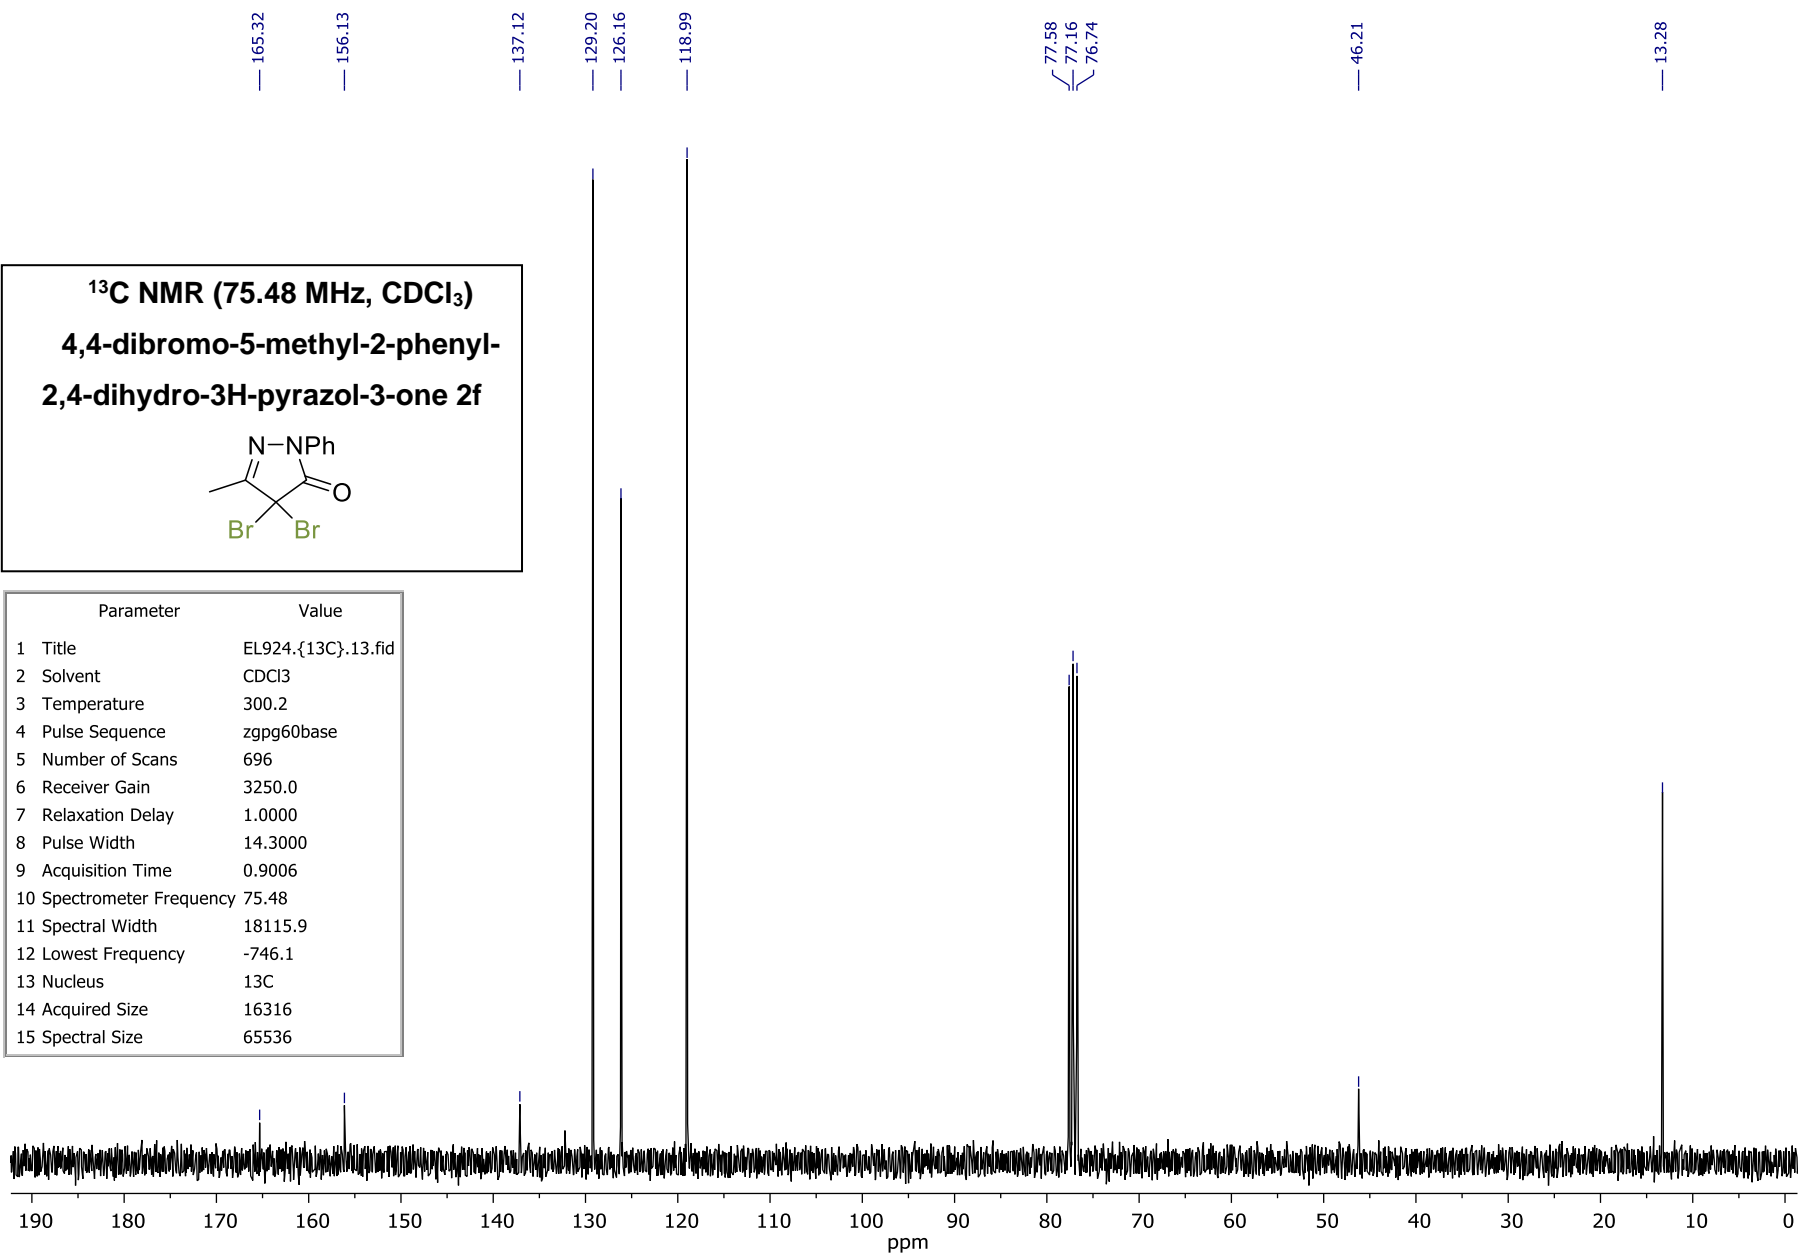

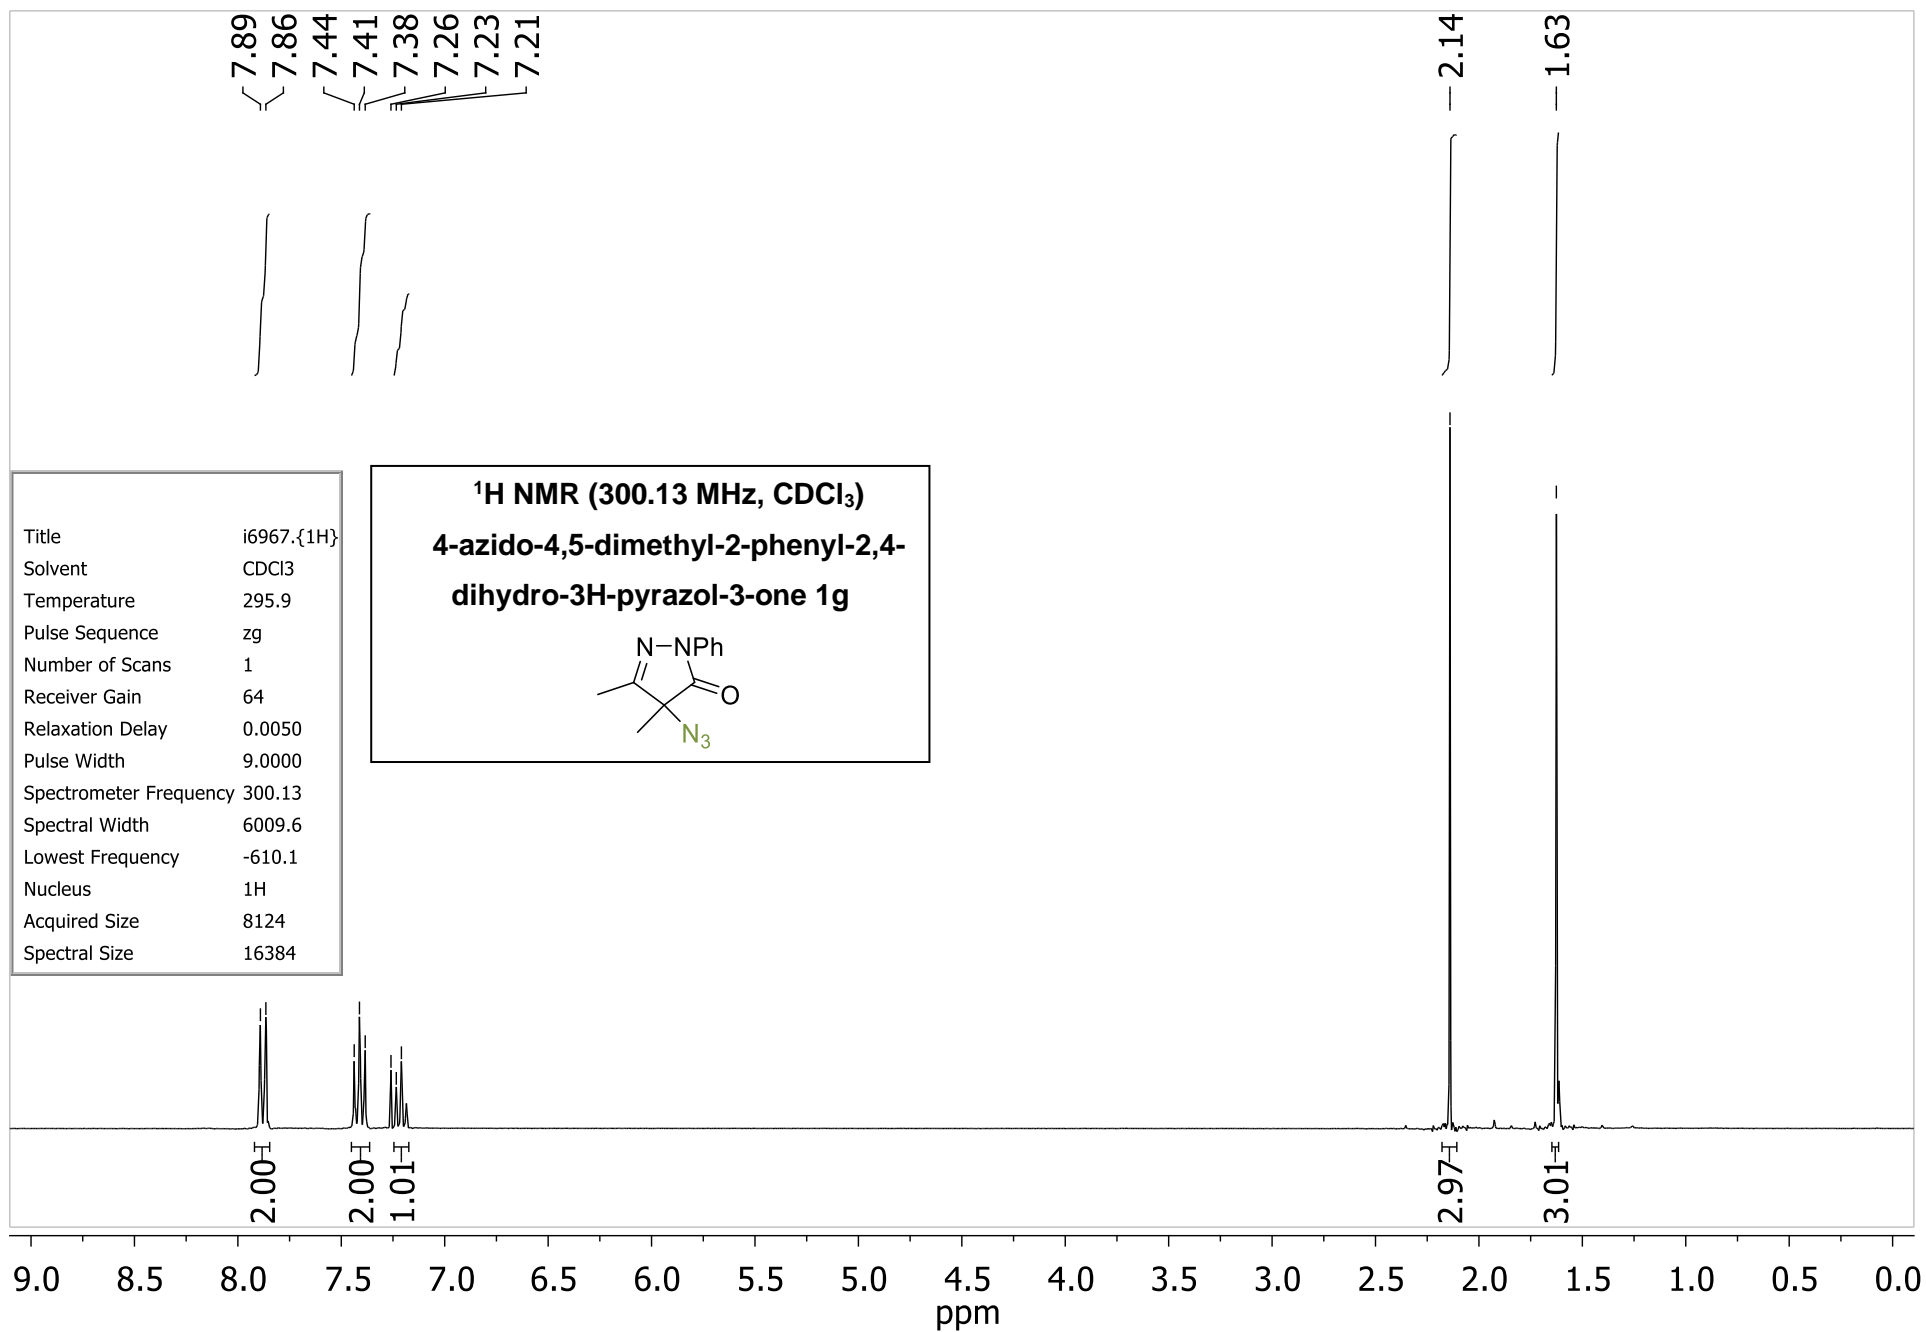

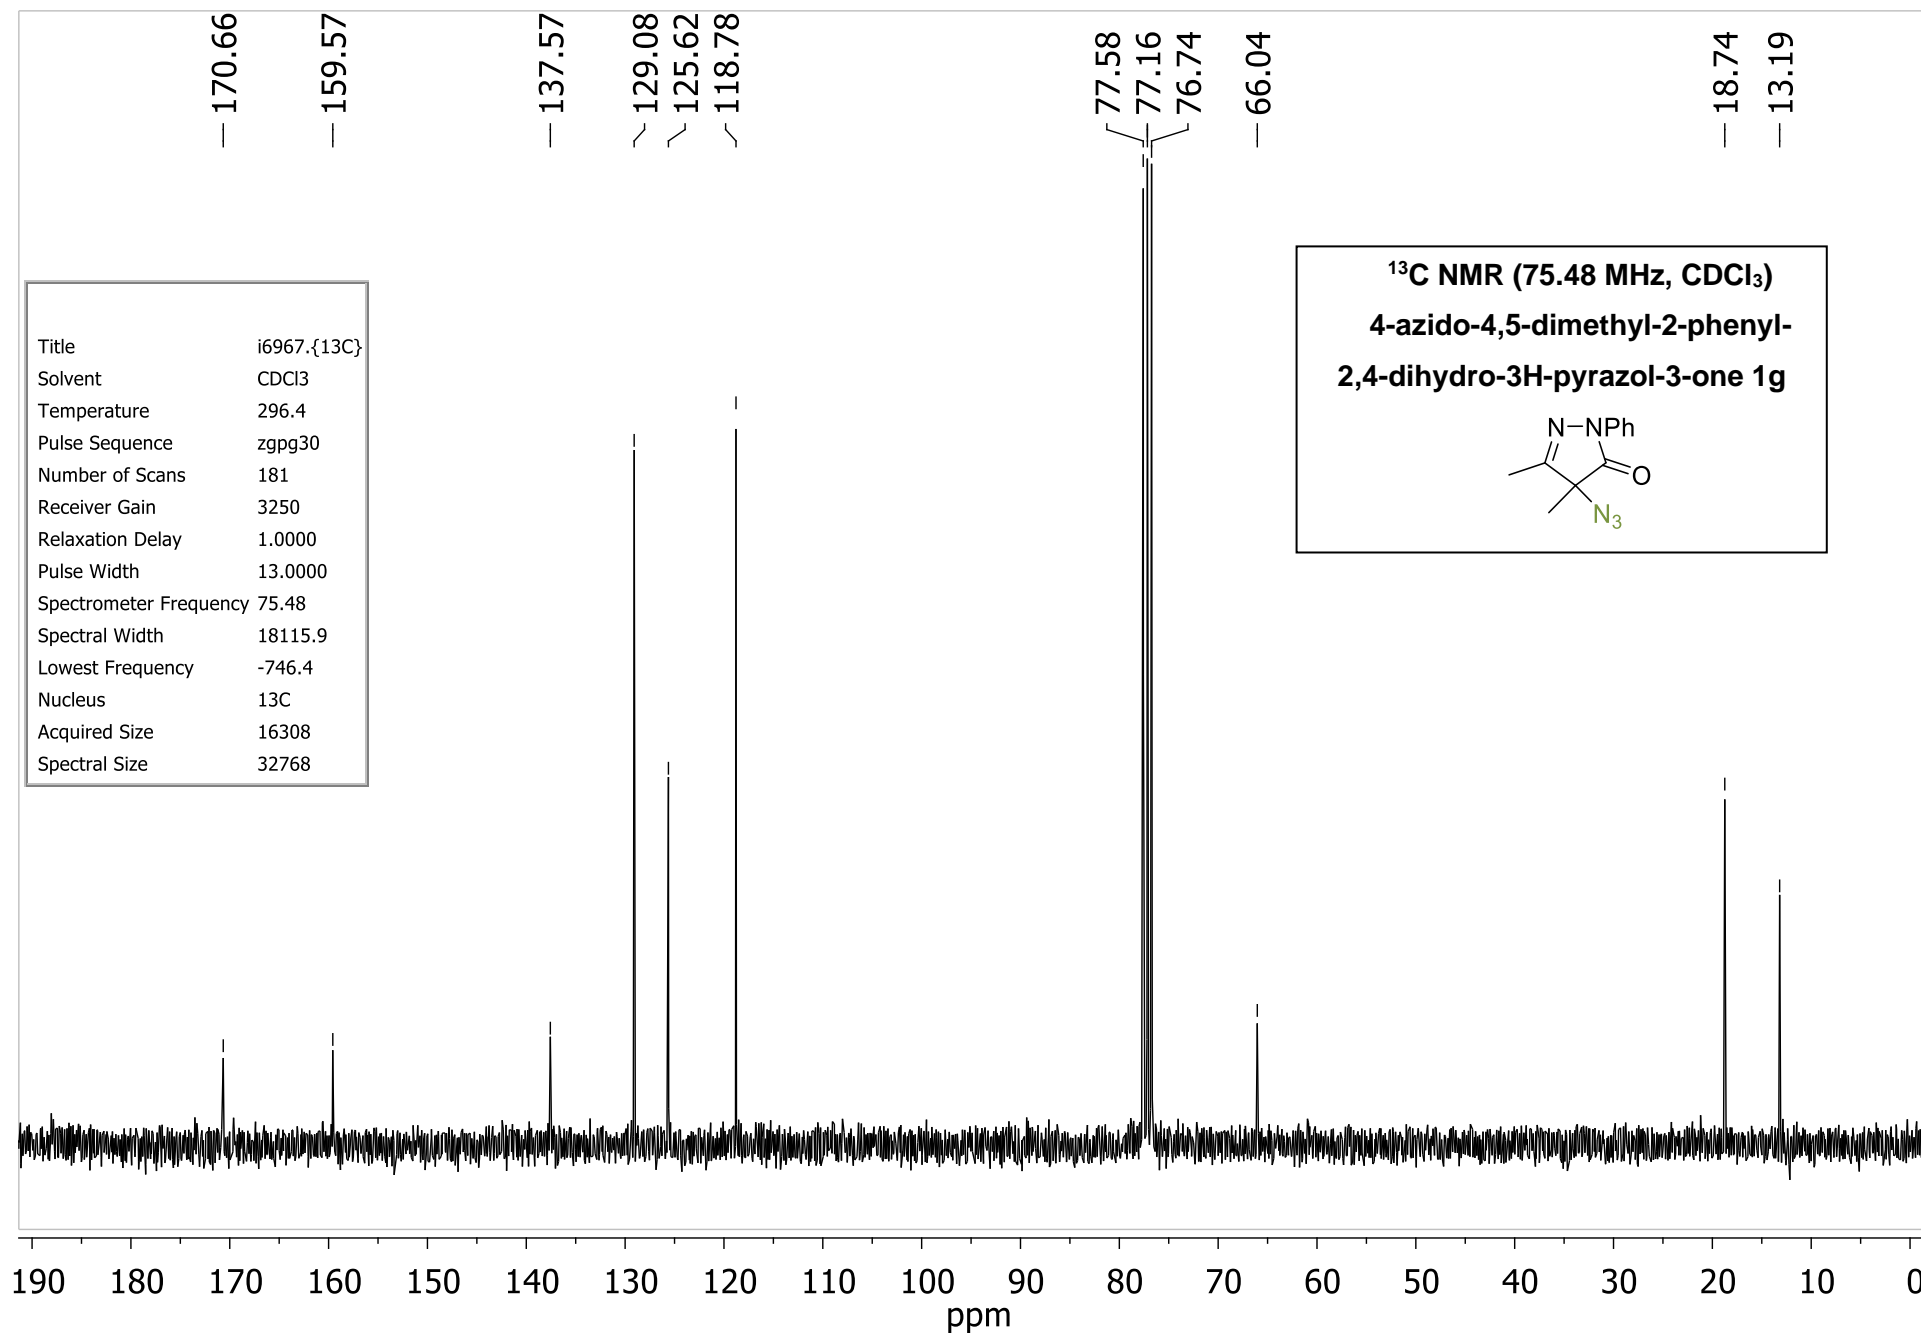

# Display Report

## Analysis Info

Acquisition Date 27.11.2020 14:25:07

Analysis Name D:\Data\Chizhov\Terentiev\Lopat'eva\I-564\_&clblow.d

Method tune\_low.m

Operator BDAL@DE

Sample Name /TERN LL-564

Instrument / Ser# microTOF 10248

Comment CH3CN 100 %, dil. 200, calibrant added

## Acquisition Parameter

|             |            |                      |          |                  |           |
|-------------|------------|----------------------|----------|------------------|-----------|
| Source Type | ESI        | Ion Polarity         | Positive | Set Nebulizer    | 0.4 Bar   |
| Focus       | Not active | Set Capillary        | 4500 V   | Set Dry Heater   | 180 °C    |
| Scan Begin  | 50 m/z     | Set End Plate Offset | -500 V   | Set Dry Gas      | 4.0 l/min |
| Scan End    | 3000 m/z   |                      |          | Set Divert Valve | Waste     |

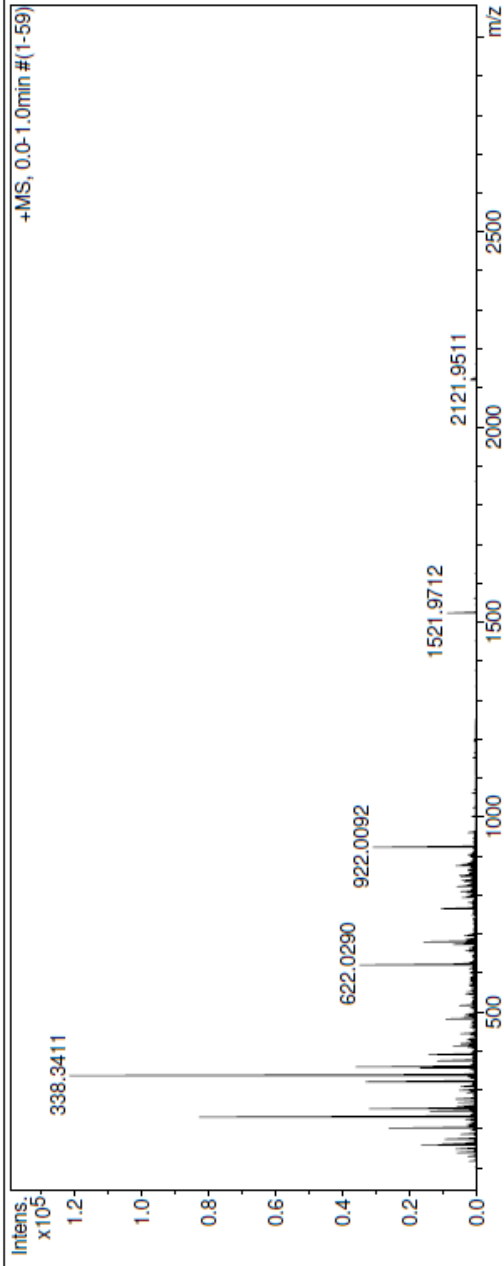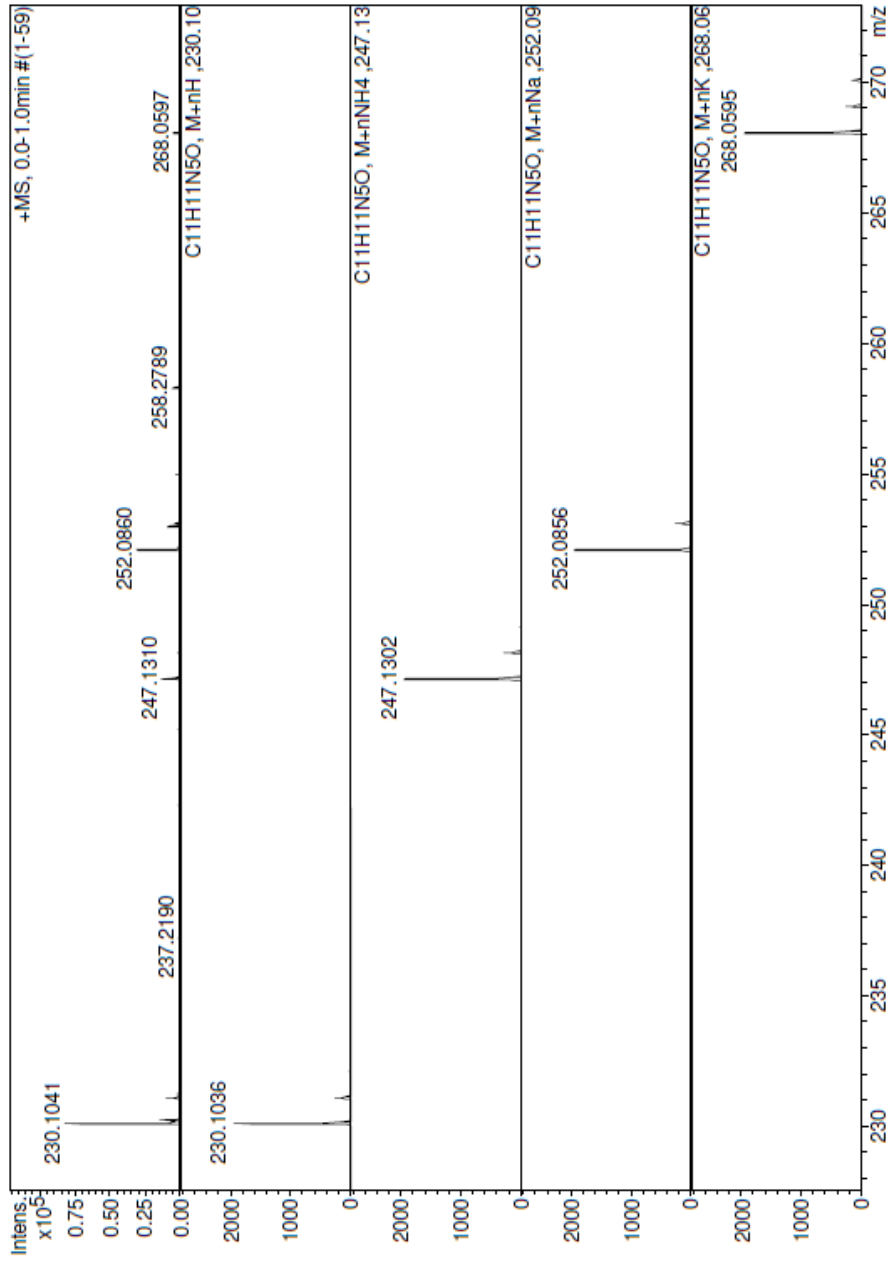

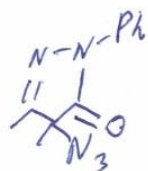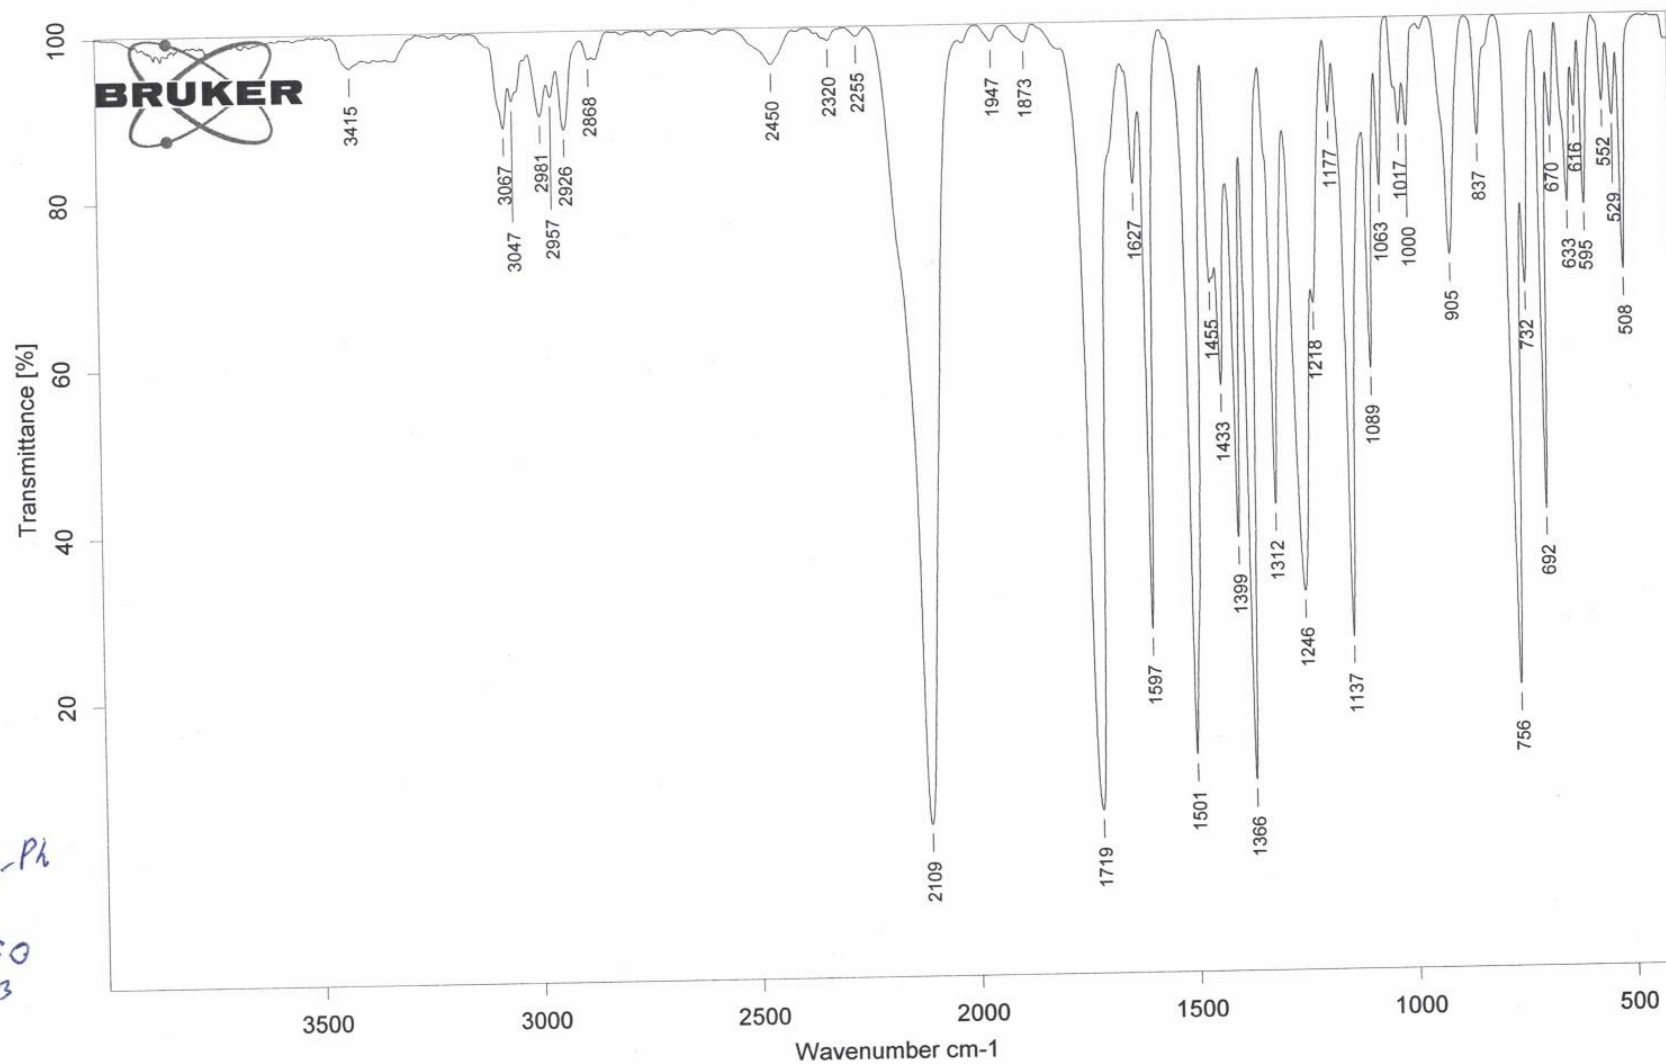

D:\ИЛ\Лопатьева LL-564.0

Лопатьева LL-564

КВг тонкий слой

10.02.2021

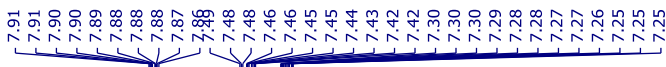

**<sup>1</sup>H NMR (300.13 MHz, CDCl<sub>3</sub>)**

**4,4-diazido-5-methyl-2-phenyl-2,4-dihydro-3H-pyrazol-3-one 2g**

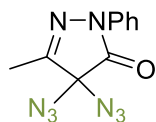

| Parameter                 | Value            |
|---------------------------|------------------|
| 1 Title                   | EL980.{1H}.1.fid |
| 2 Solvent                 | CDCl3            |
| 3 Temperature             | 298.0            |
| 4 Pulse Sequence          | zg               |
| 5 Number of Scans         | 1                |
| 6 Receiver Gain           | 32.0             |
| 7 Relaxation Delay        | 0.1000           |
| 8 Pulse Width             | 14.7000          |
| 9 Acquisition Time        | 2.7724           |
| 10 Spectrometer Frequency | 300.23           |
| 11 Spectral Width         | 5882.4           |
| 12 Lowest Frequency       | -1087.3          |
| 13 Nucleus                | 1H               |
| 14 Acquired Size          | 16308            |
| 15 Spectral Size          | 65536            |

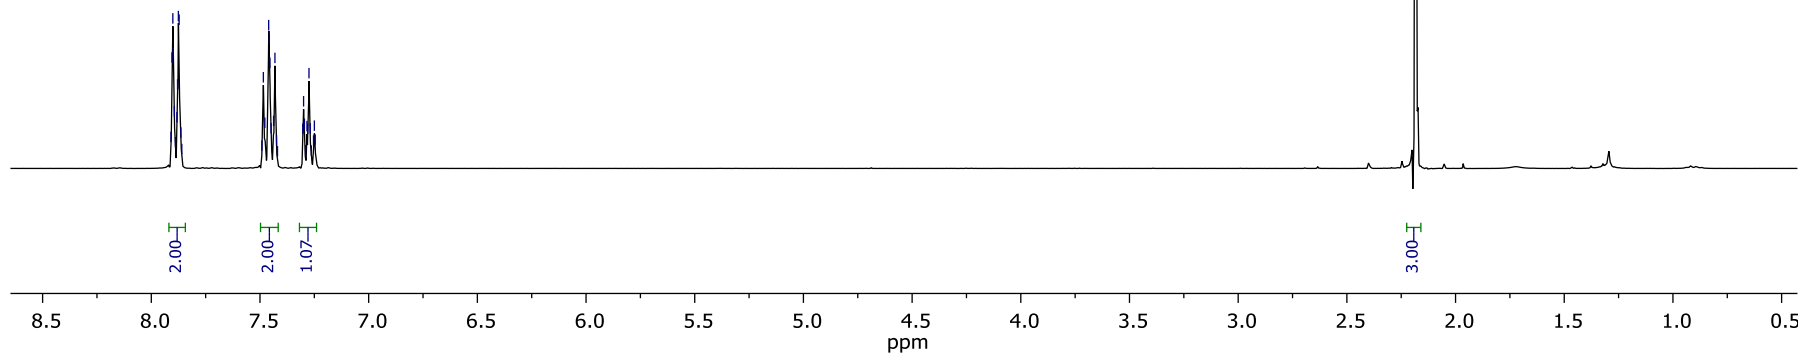

**$^{13}\text{C}$  NMR (75.48 MHz,  $\text{CDCl}_3$ )**  
**4,4-diazido-5-methyl-2-phenyl-**  
**2,4-dihydro-3H-pyrazol-3-one 2g**

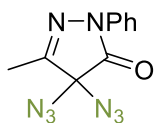

| Parameter                 | Value                           |
|---------------------------|---------------------------------|
| 1 Title                   | EL980.{ $^{13}\text{C}$ }.2.fid |
| 2 Solvent                 | $\text{CDCl}_3$                 |
| 3 Temperature             | 298.0                           |
| 4 Pulse Sequence          | zgpg30                          |
| 5 Number of Scans         | 256                             |
| 6 Receiver Gain           | 101.0                           |
| 7 Relaxation Delay        | 0.8000                          |
| 8 Pulse Width             | 9.9000                          |
| 9 Acquisition Time        | 1.1431                          |
| 10 Spectrometer Frequency | 75.50                           |
| 11 Spectral Width         | 17857.1                         |
| 12 Lowest Frequency       | -1373.8                         |
| 13 Nucleus                | $^{13}\text{C}$                 |
| 14 Acquired Size          | 20412                           |
| 15 Spectral Size          | 65536                           |

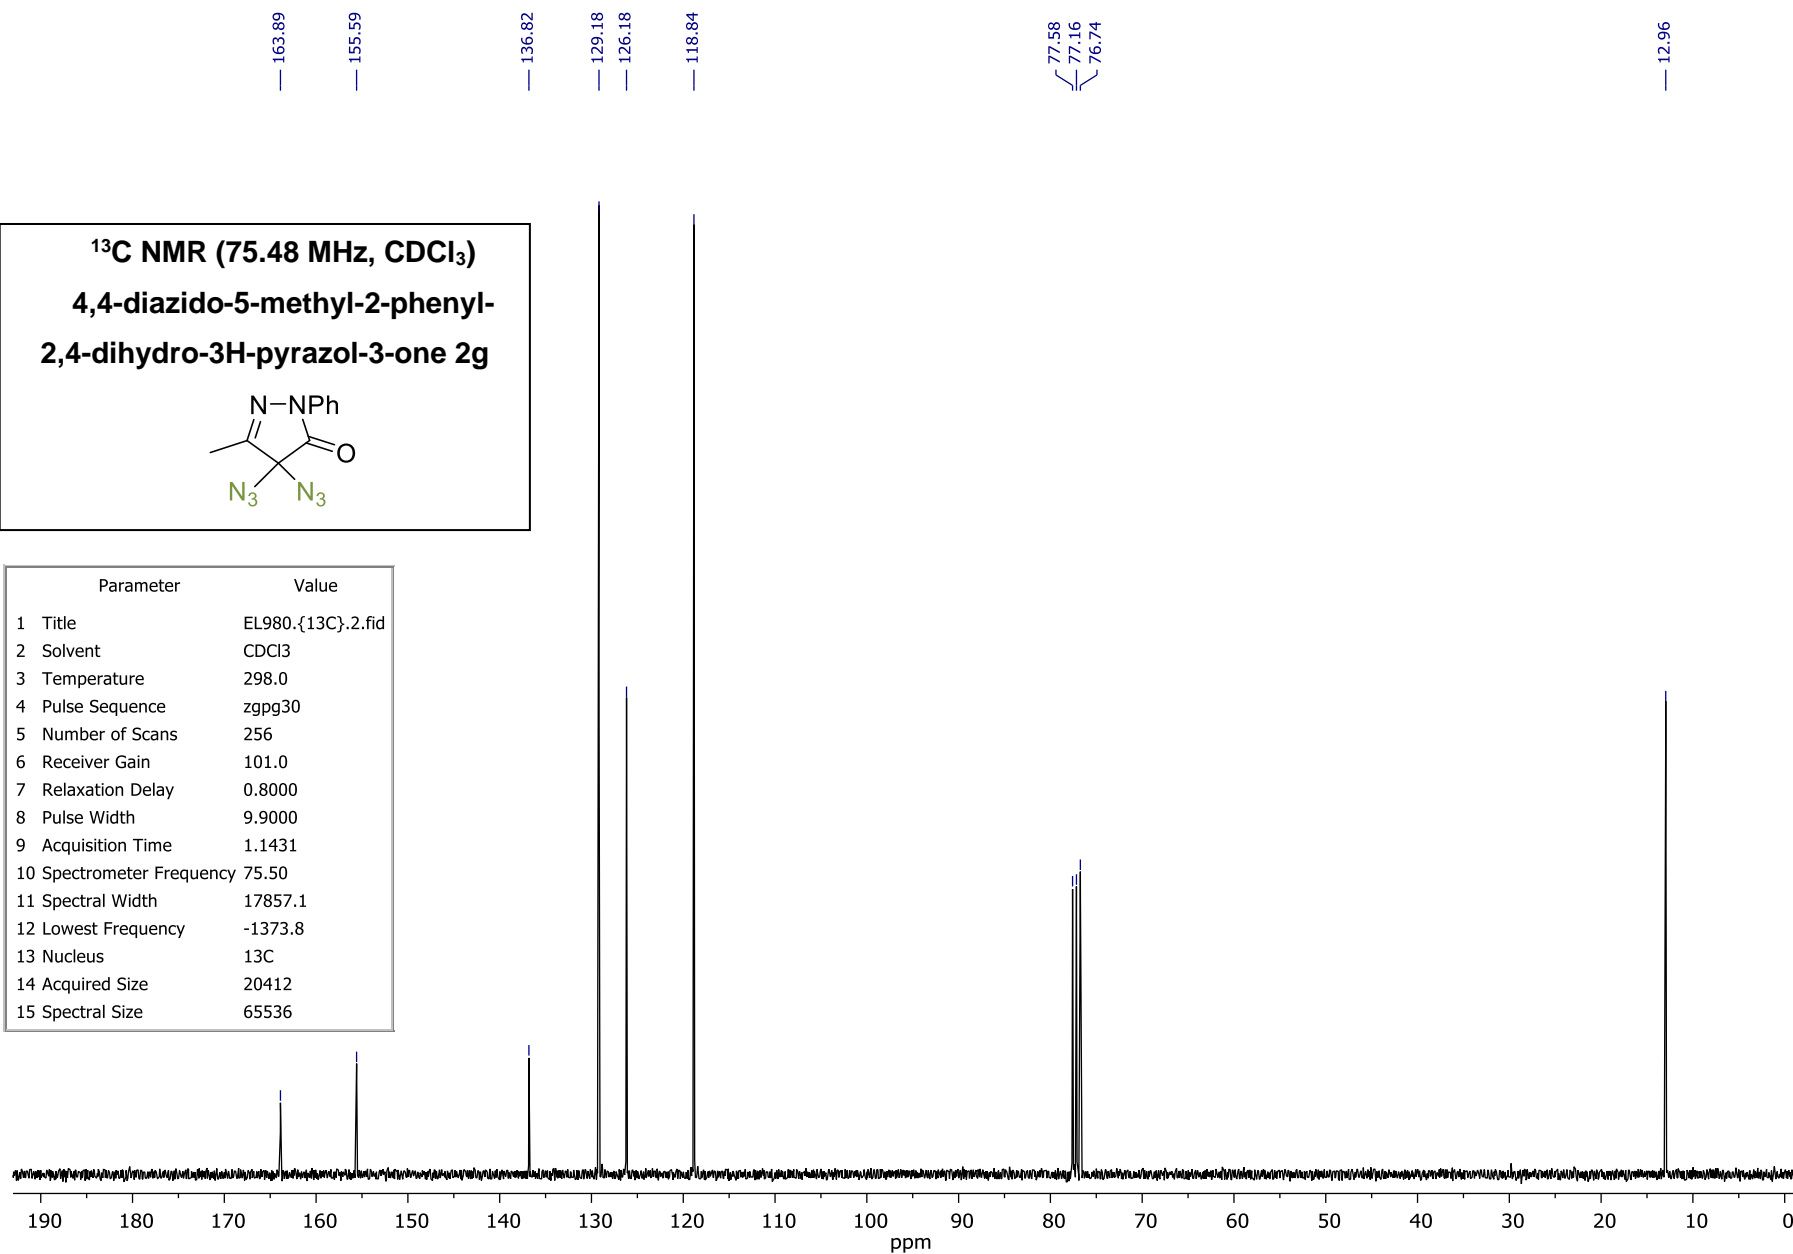



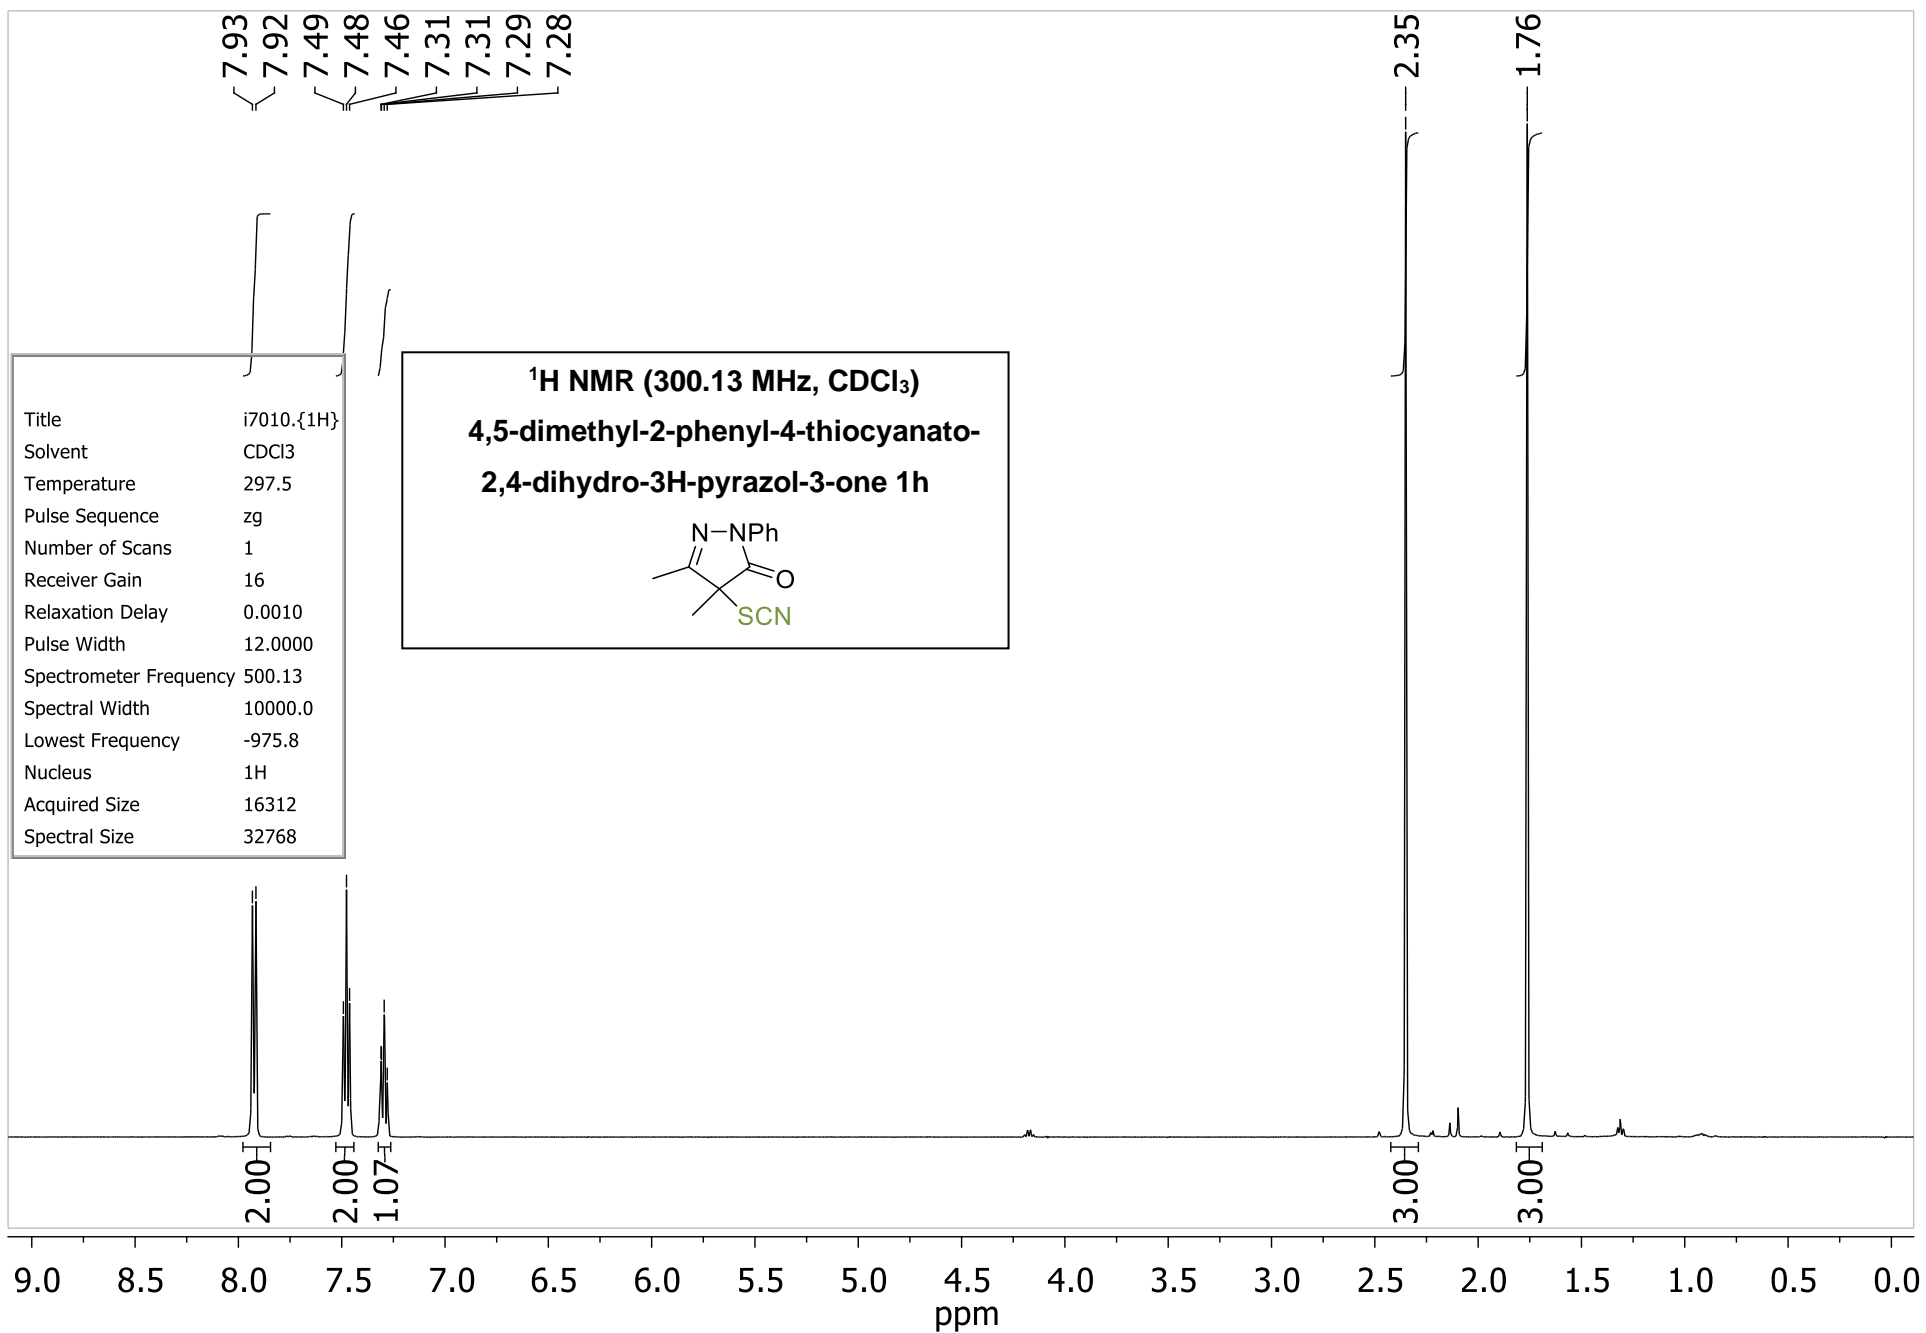

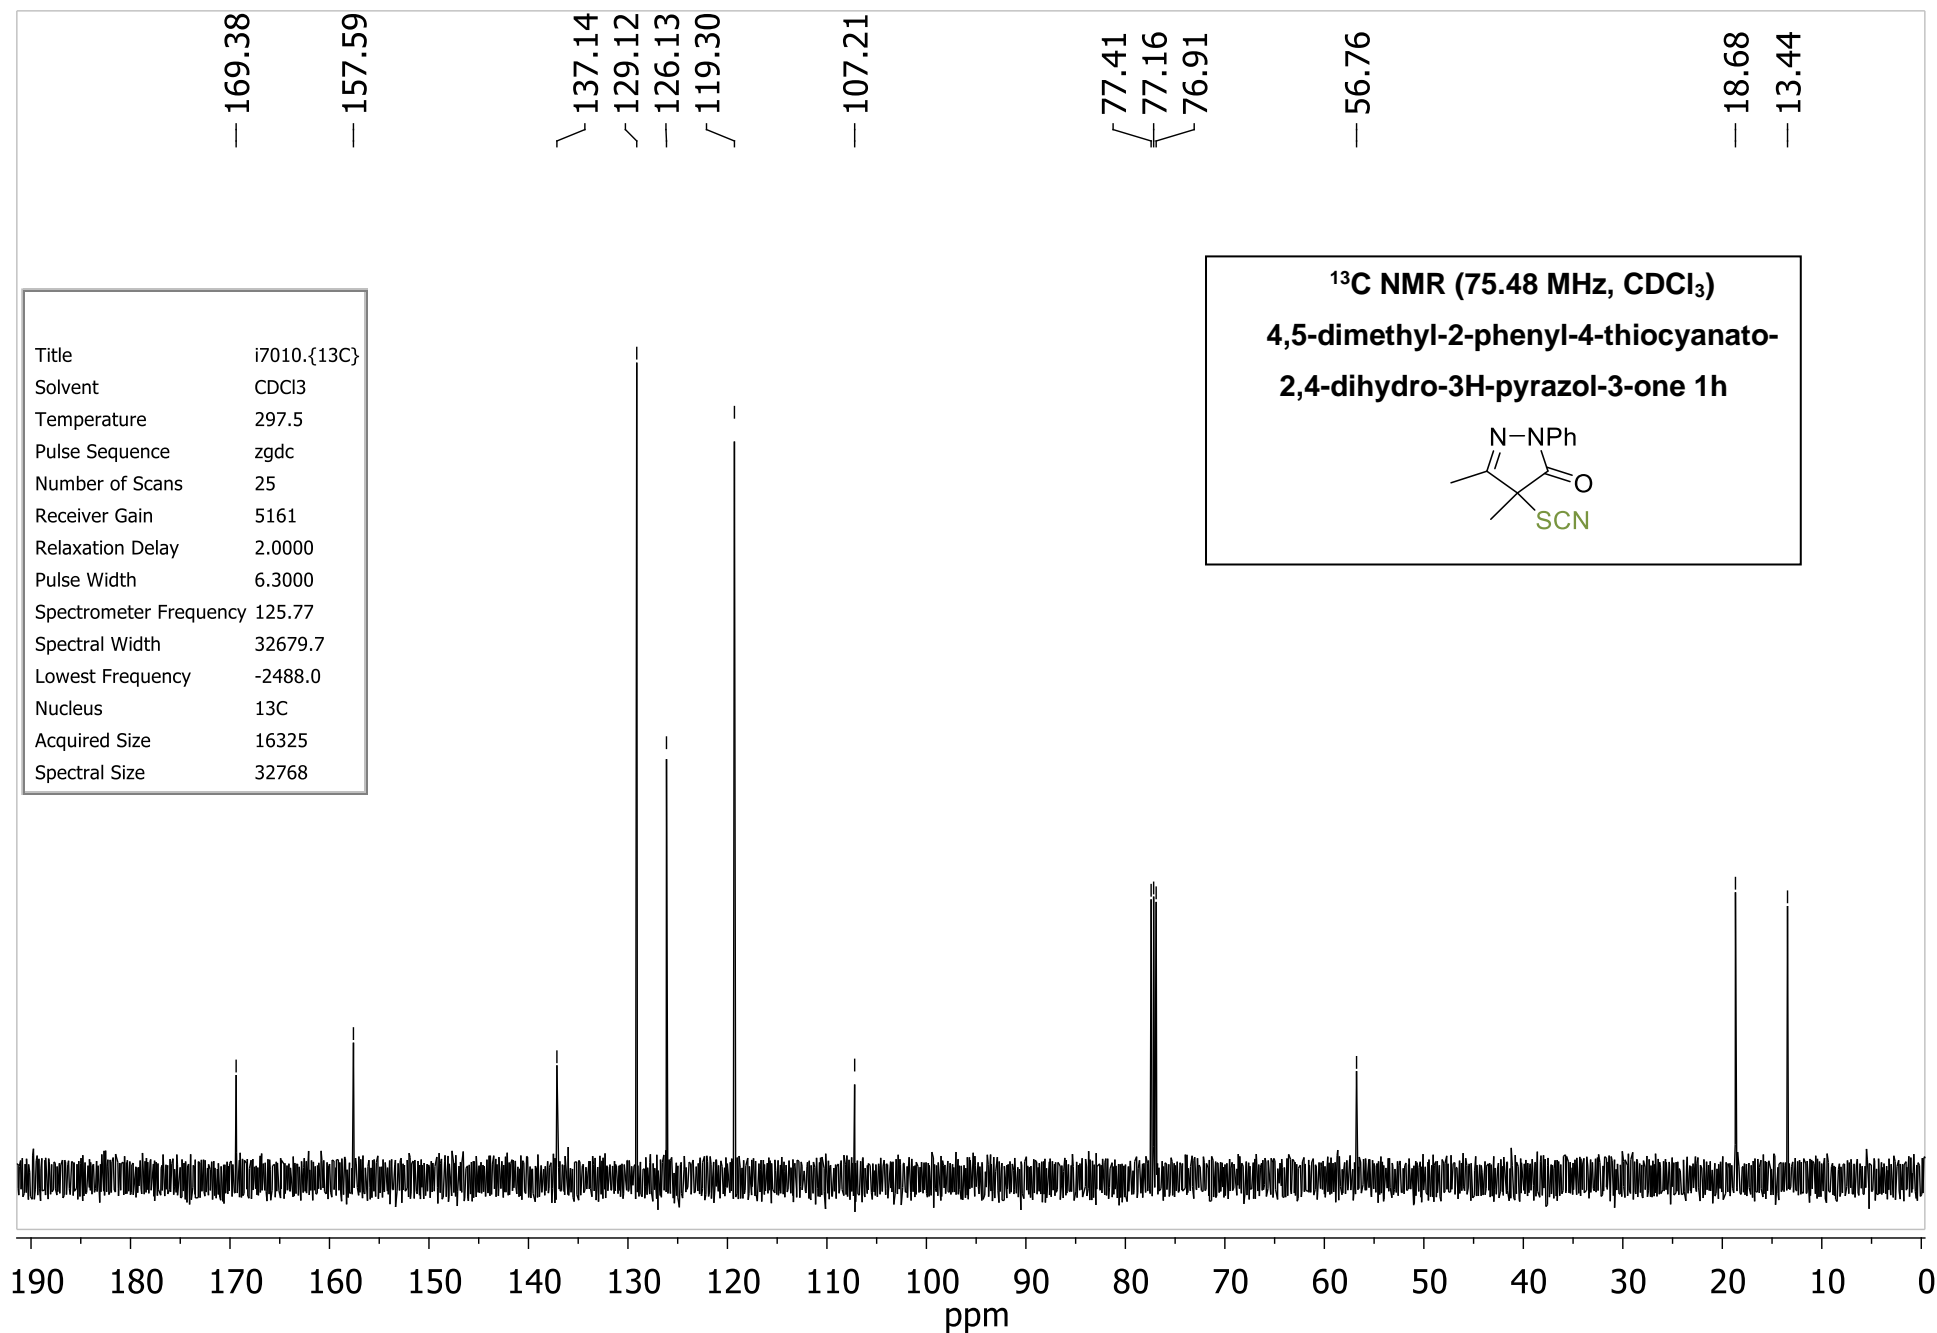

Supplement: s1 [file s1]
